# Supplementary material for: Bifunctional CYP81AA proteins catalyse identical hydroxylations but alternative regioselective phenol couplings in plant xanthone biosynthesis
Source: PubMed Central journal article supplement (PMC4858744; doi:10.1038/ncomms11472), 2016-05-05
Supplement: ncomms11472-s1.pdf [file ncomms11472-s1.pdf]

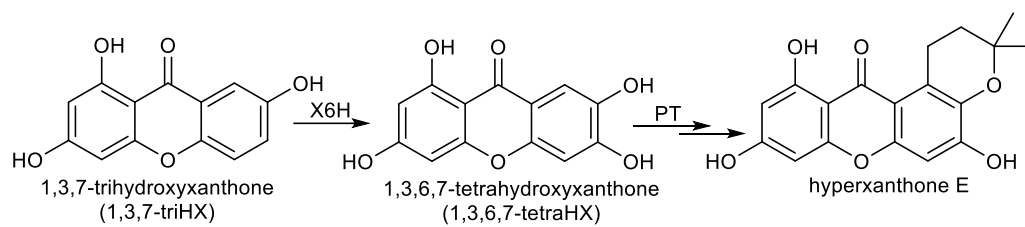

**Supplementary Figure 1 | Proposed biosynthesis of hyperxanthone E from 1,3,7-triHX in elicitor-treated *H. calycinum* cell cultures.** X6H, xanthone 6-hydroxylase; PT, prenyltransferase.

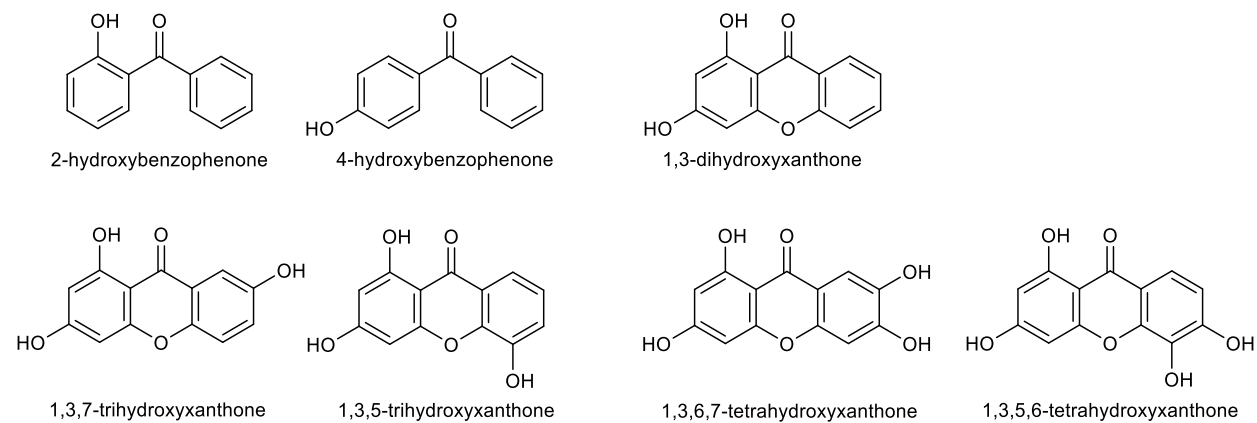

**Supplementary Figure 2 | Substrates not accepted by CYP81AA1 and CYP81AA2.**

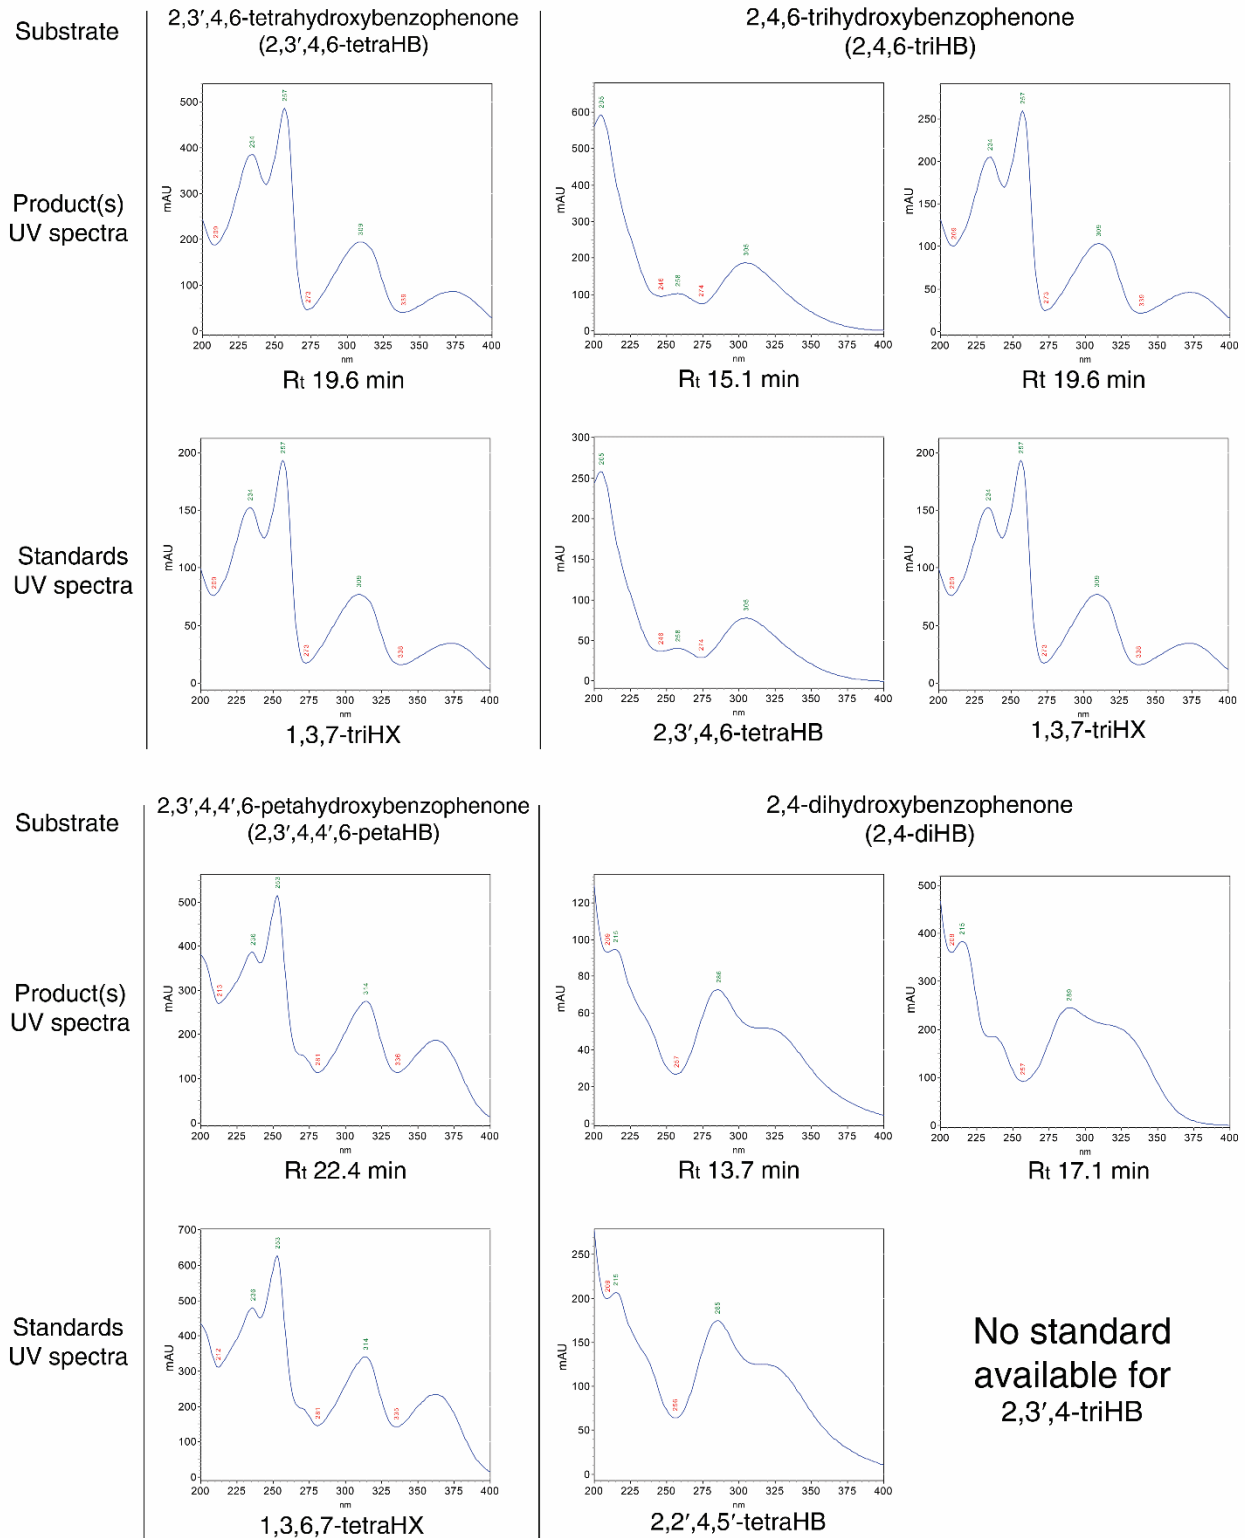

Supplementary Figure 3 | UV spectra of CYP81AA1 products and authentic compounds.

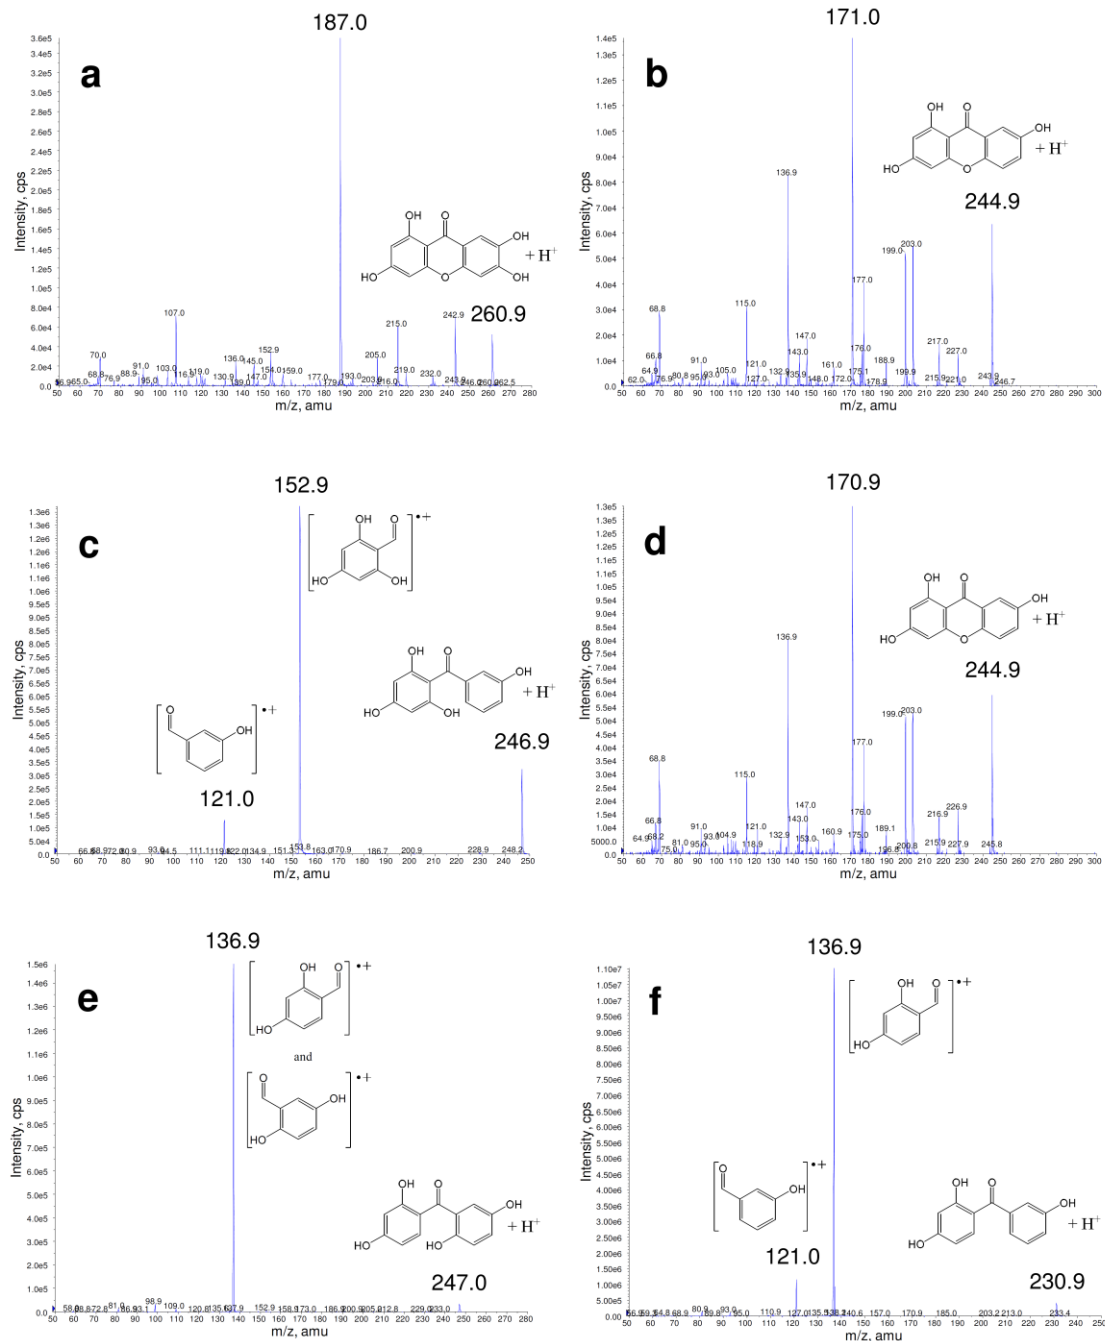

**Supplementary Figure 4 | Enhanced product ion (EPI) mass spectra of CYP81AA1 products formed from various substrates. (a) 1,3,6,7-tetraHX ( $R_t = 22.3$  min) from 2,3',4,4',6-pentaHB. (b) 1,3,7-triHX ( $R_t = 19.6$  min) from 2,3',4,6-tetraHB. (c) 2,3',4,6-tetraHB ( $R_t = 15.1$  min) from 2,4,6-triHB. (d) 1,3,7-triHX ( $R_t = 19.6$  min) from 2,4,6-triHB. (e) 2,2',4,5'-tetraHB ( $R_t = 13.7$  min) from 2,4-diHB. (f) 2,3',4-triHB ( $R_t = 17.1$  min) from 2,4-diHB.**

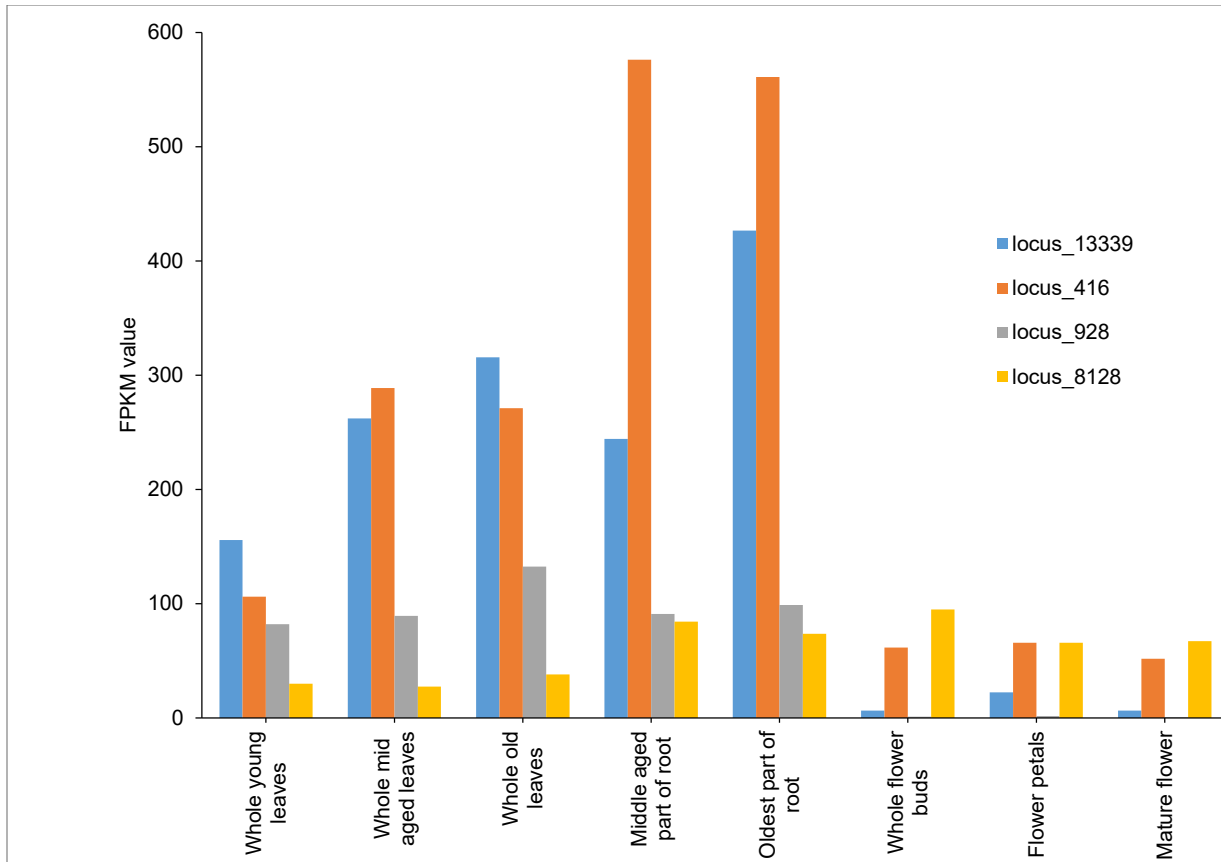

**Supplementary Figure 5 | Tissue distribution of transcripts encoded by the loci 13339 (*HpBPS*), 416 (*HpCYP81AA1*), 928 (*HpCYP81AA2*), and 8128 (*HpCYP81AA3*).** Data are taken from the MPGR database (<http://medicinalplantgenomics.msu.edu>). FPKM, fragments per kilobase per million mapped fragments.

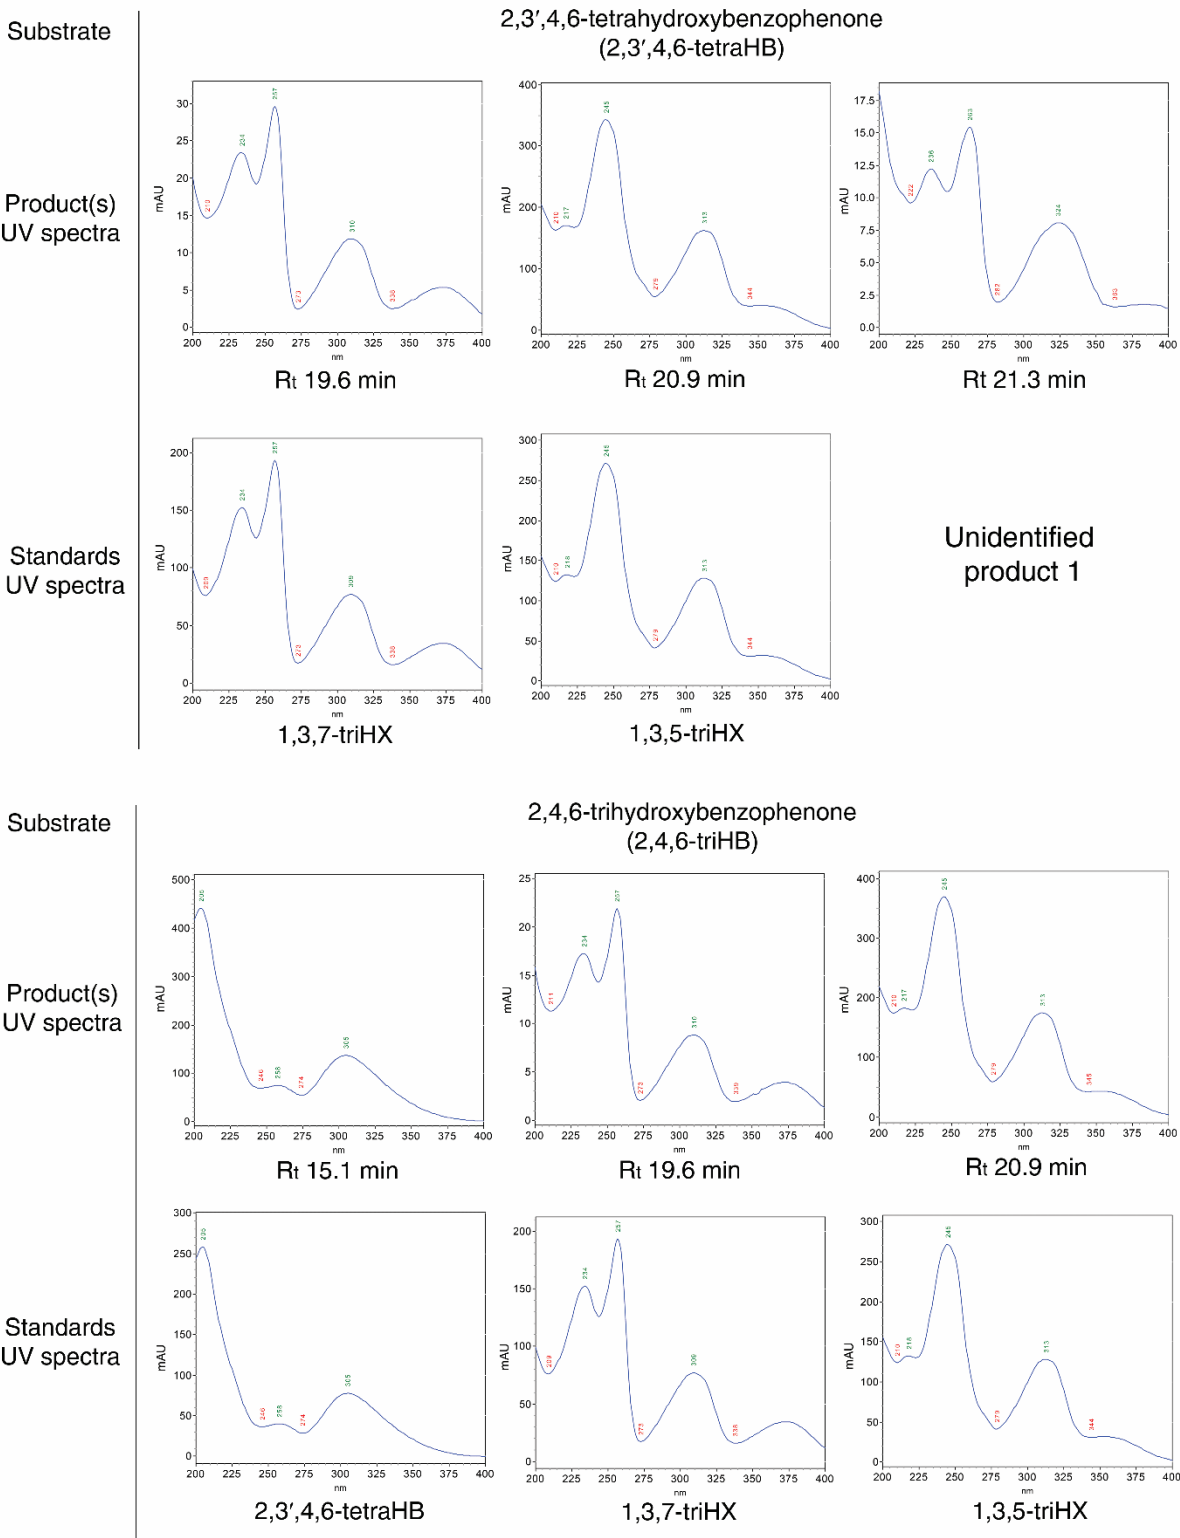

Supplementary Figure 6 | UV spectra of CYP81AA2 products and authentic compounds (I).

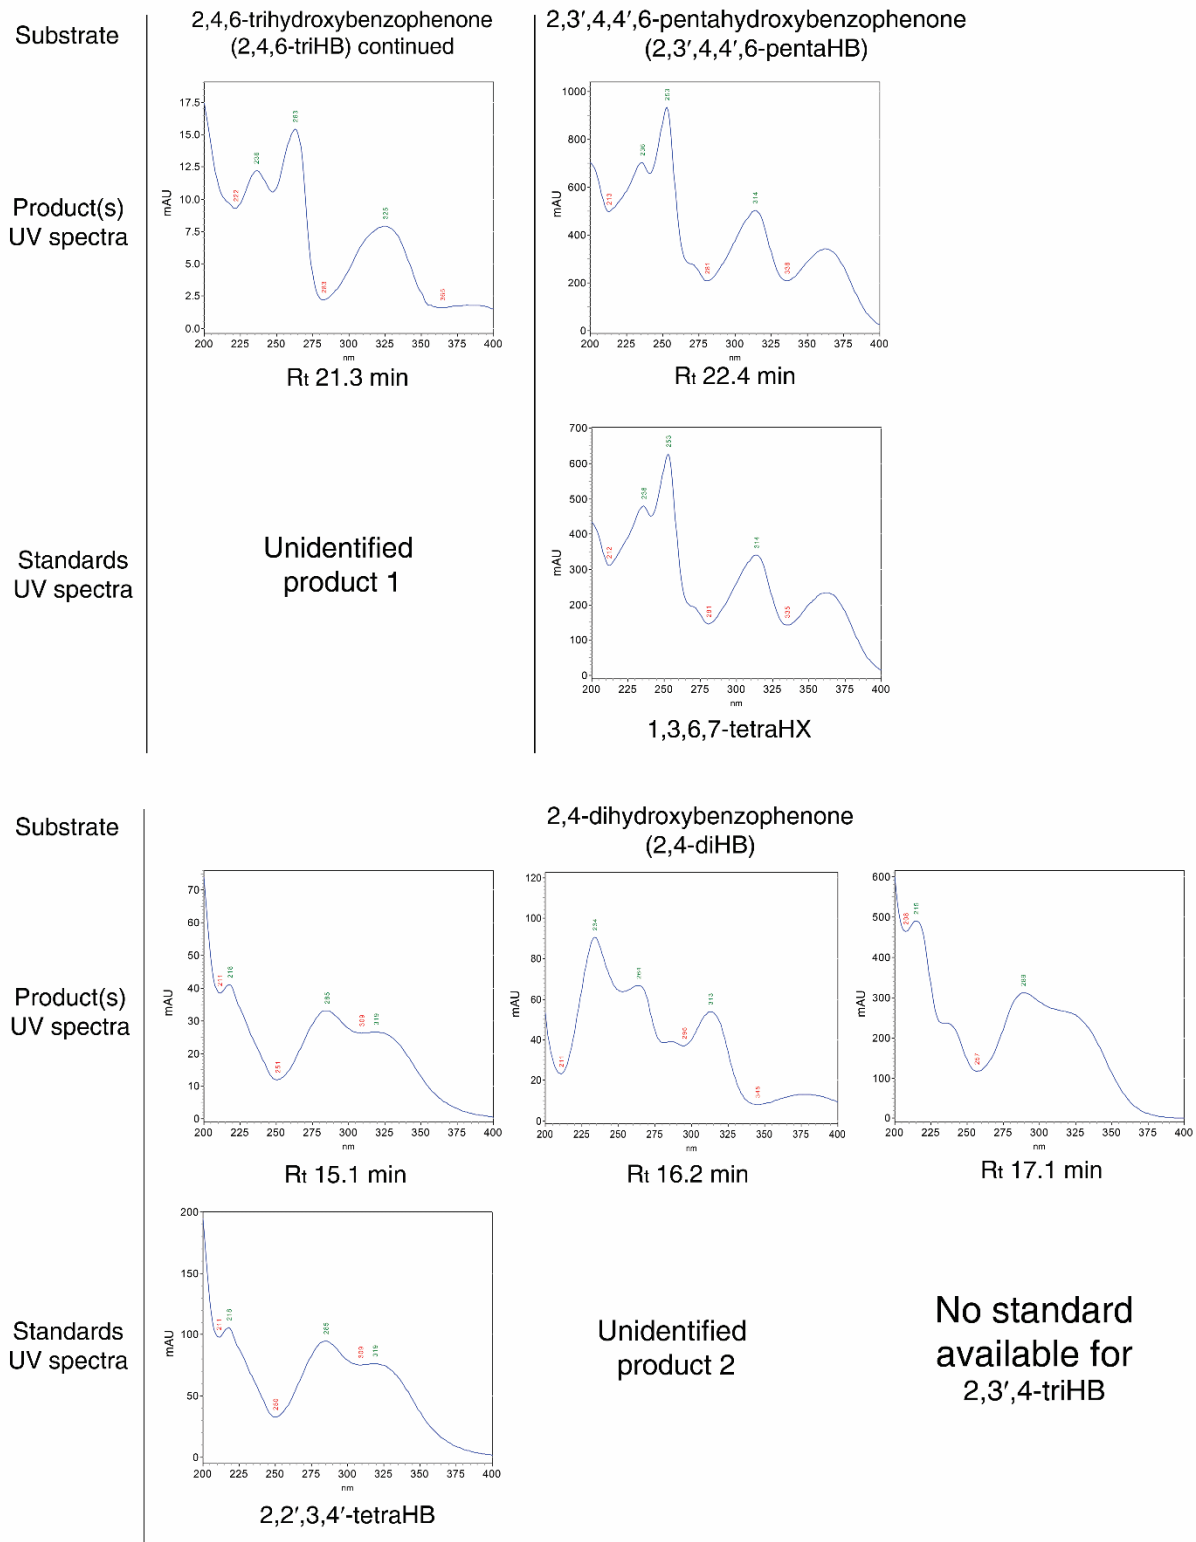

Supplementary Figure 6 | UV spectra of CYP81AA2 products and authentic compounds (II).

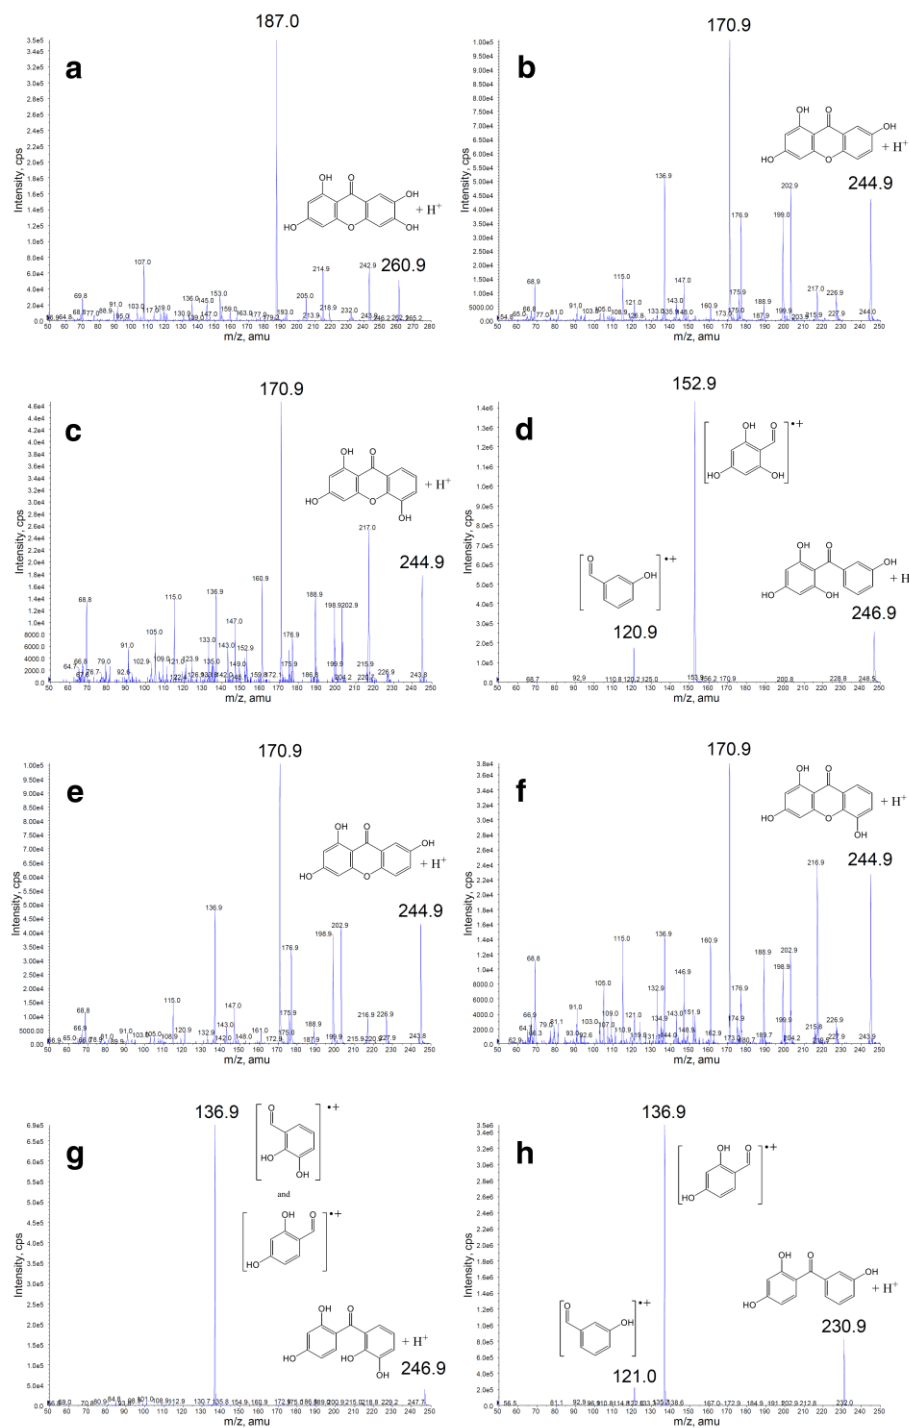

**Supplementary Figure 7 | Enhanced product ion (EPI) mass spectra of CYP81AA2 products formed from various substrates. (a)** 1,3,6,7-tetraHX ( $R_t = 22.3$  min) from 2,3',4,4',6-pentaHB. **(b)** 1,3,7-triHX ( $R_t = 19.6$  min) from 2,3',4,6-tetraHB. **(c)** 1,3,5-triHX ( $R_t = 20.9$  min) from 2,3',4,6-tetraHB. **(d)** 2,3',4,6-tetraHB ( $R_t = 15.1$  min) from 2,4,6-triHB. **(e)** 1,3,7-triHX ( $R_t = 19.6$  min) from 2,4,6-triHB. **(f)** 1,3,5-triHX ( $R_t = 20.9$  min) from 2,4,6-triHB. **(g)** 2,2',3,4'-tetraHB ( $R_t = 15.1$  min) from 2,4-diHB. **(h)** 2,3',4-triHB ( $R_t = 17.1$  min) from 2,4-diHB.



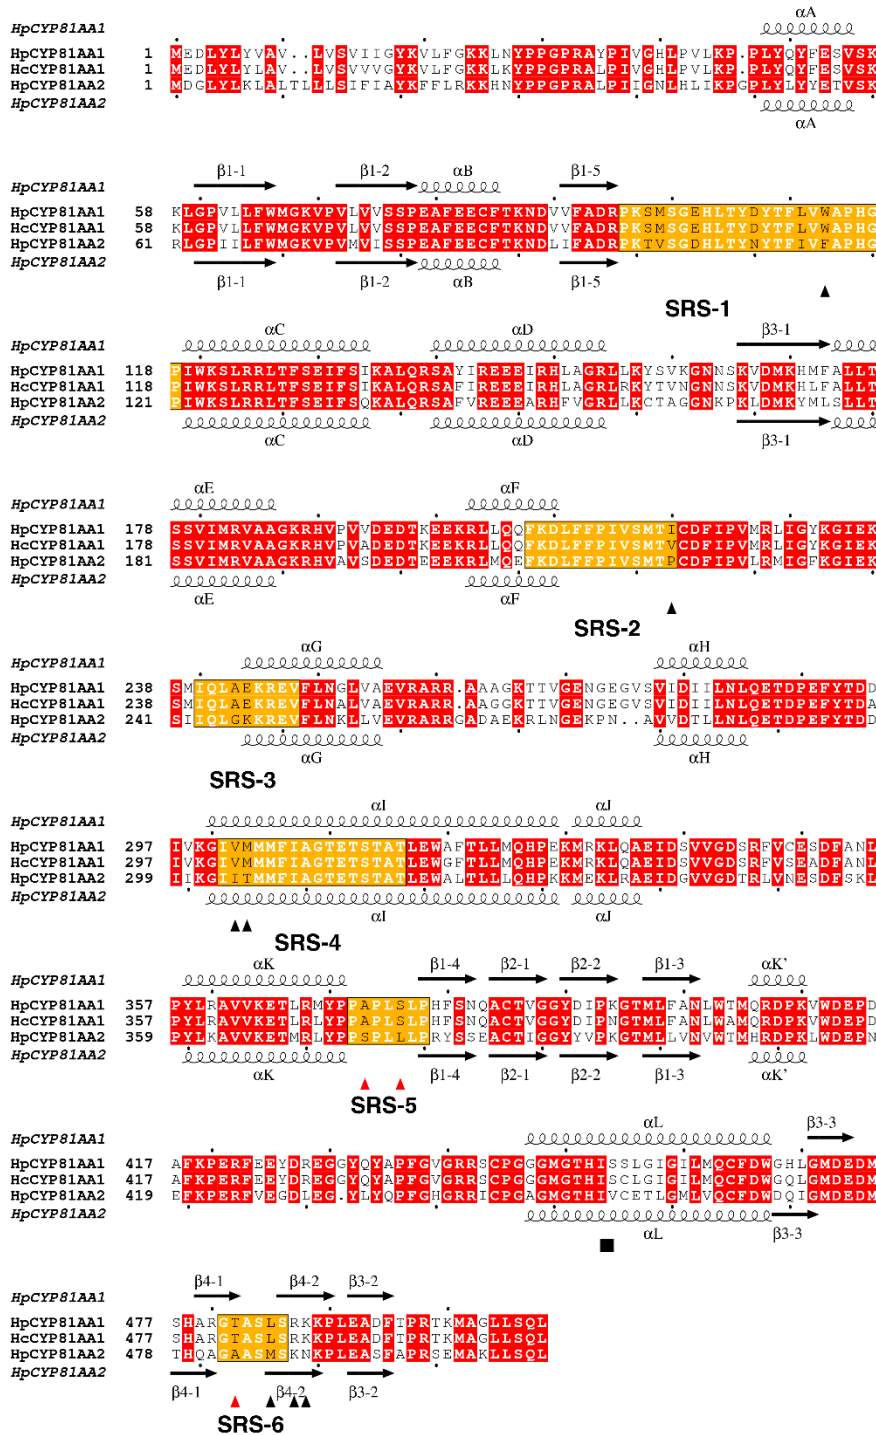

**Supplementary Figure 8 | Multiple sequence alignment of HpCYP81AA1, HcCYP81AA1 and HpCYP81AA2.** The conserved secondary structures of HpCYP81AA1 and HpCYP81AA2 are indicated on the top and the bottom, respectively. SRSs 1-6 are highlighted in orange. The black triangles point to positions that were mutated and the red triangles refer to the deduced regioselectivity-determining residues in HpCYP81AA2. The black square refers to the position of the C-terminal exchange.

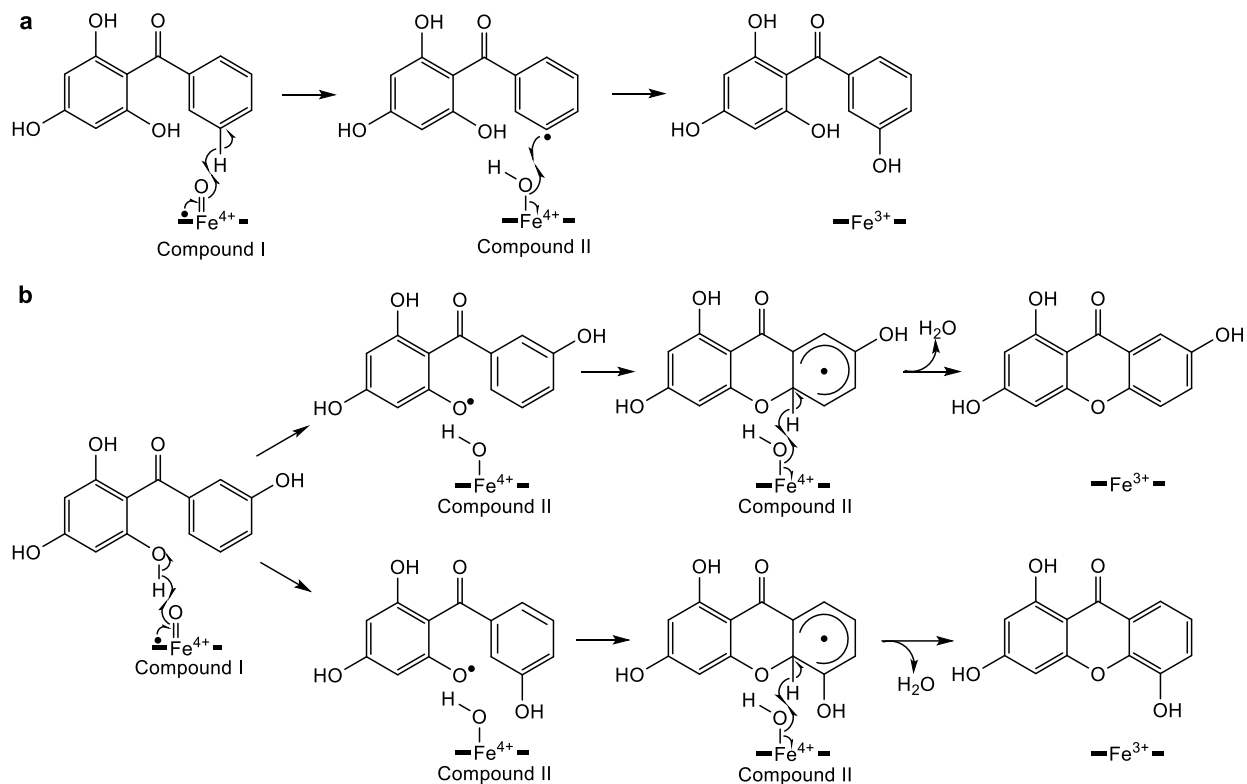

**Supplementary Figure 9 | Proposed reaction processes catalyzed by CYP81AA1 and CYP81AA2. (a) Hydroxylation reaction at the 3'-position of 2,4,6-triHB catalyzed by both enzymes. (b) Regioselective C–O phenol coupling reactions occurring either *para* or *ortho* to the introduced 3'-hydroxy group catalyzed by CYP81AA1 and CYP81AA2, respectively.**

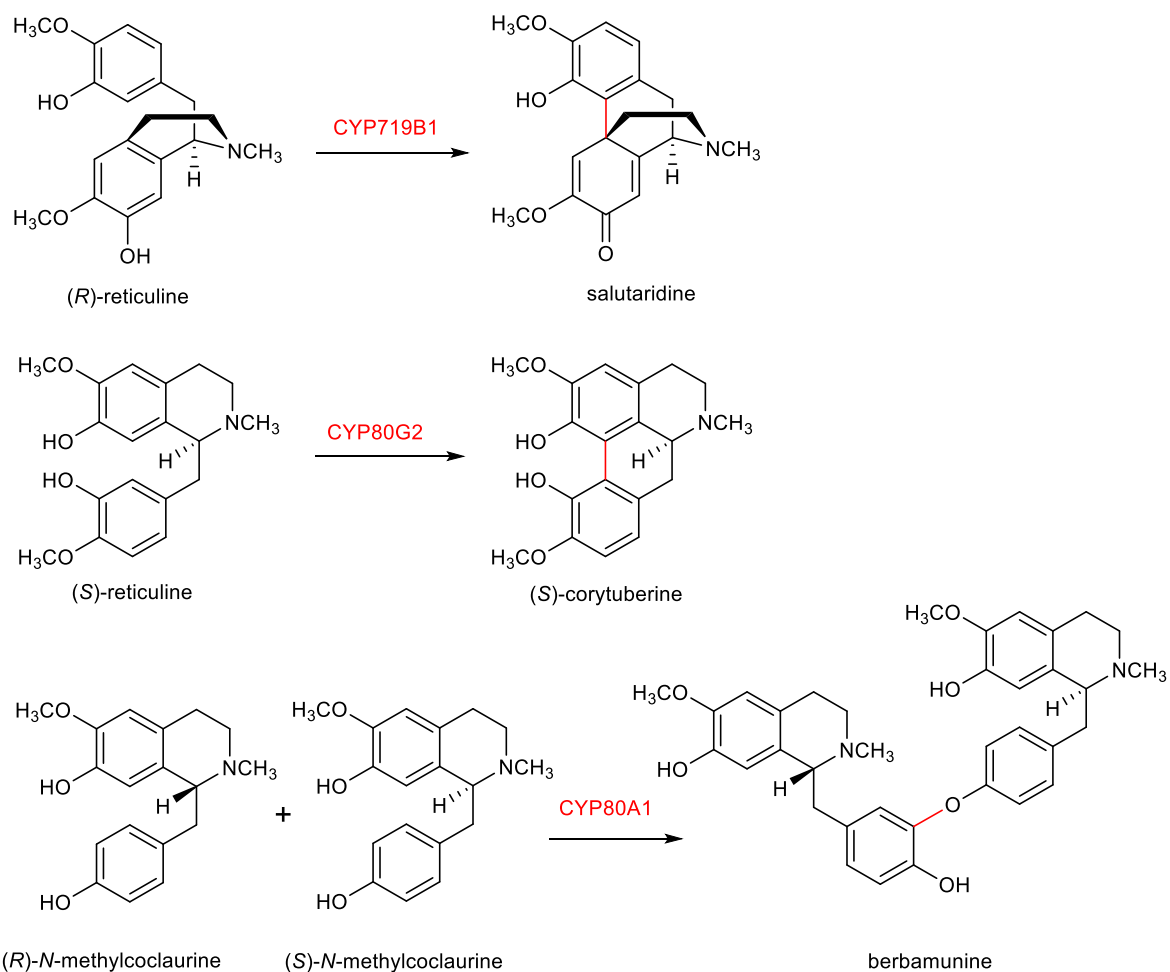

**Supplementary Figure 10 | Phenol coupling reactions catalyzed by plant CYPs in isoquinoline alkaloids biosyntheses.**

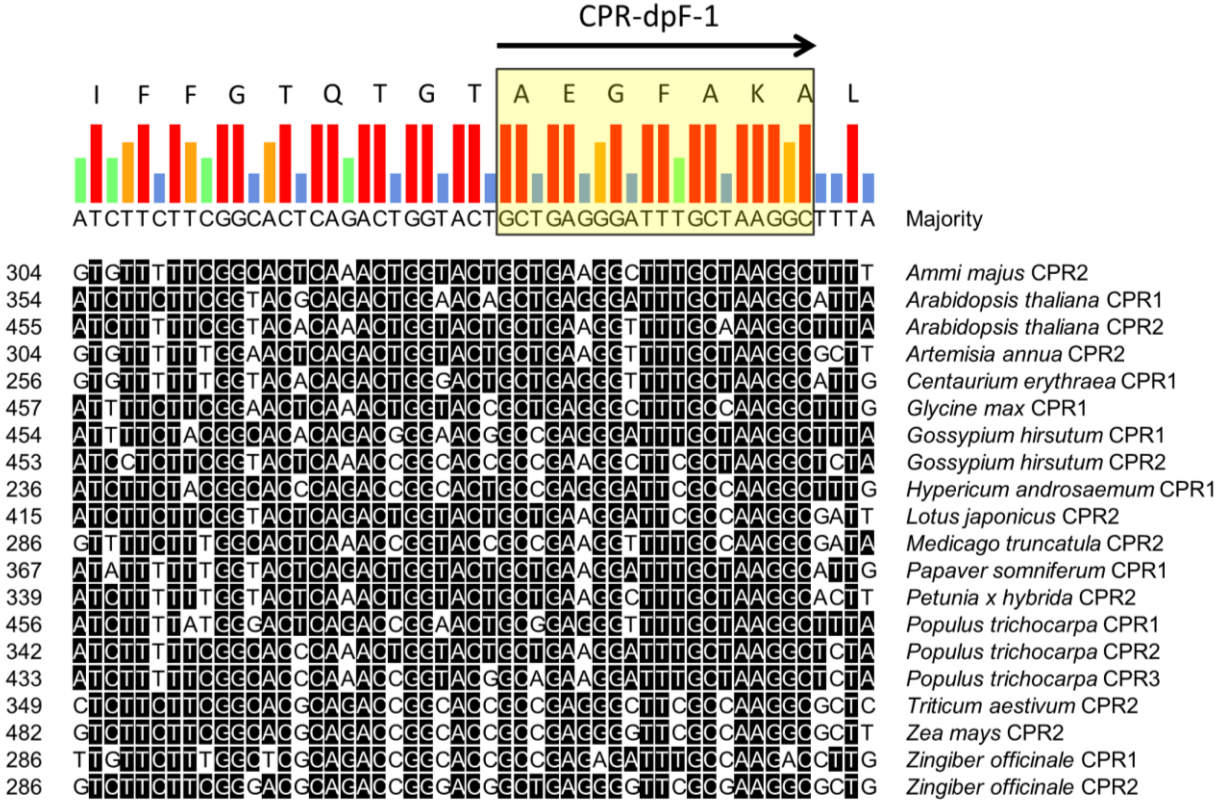

**Supplementary Figure 11 | Multiple sequence alignment of the FMN binding domains of 20 plant CPRs for designing the CPR-dpF-1 primer.**

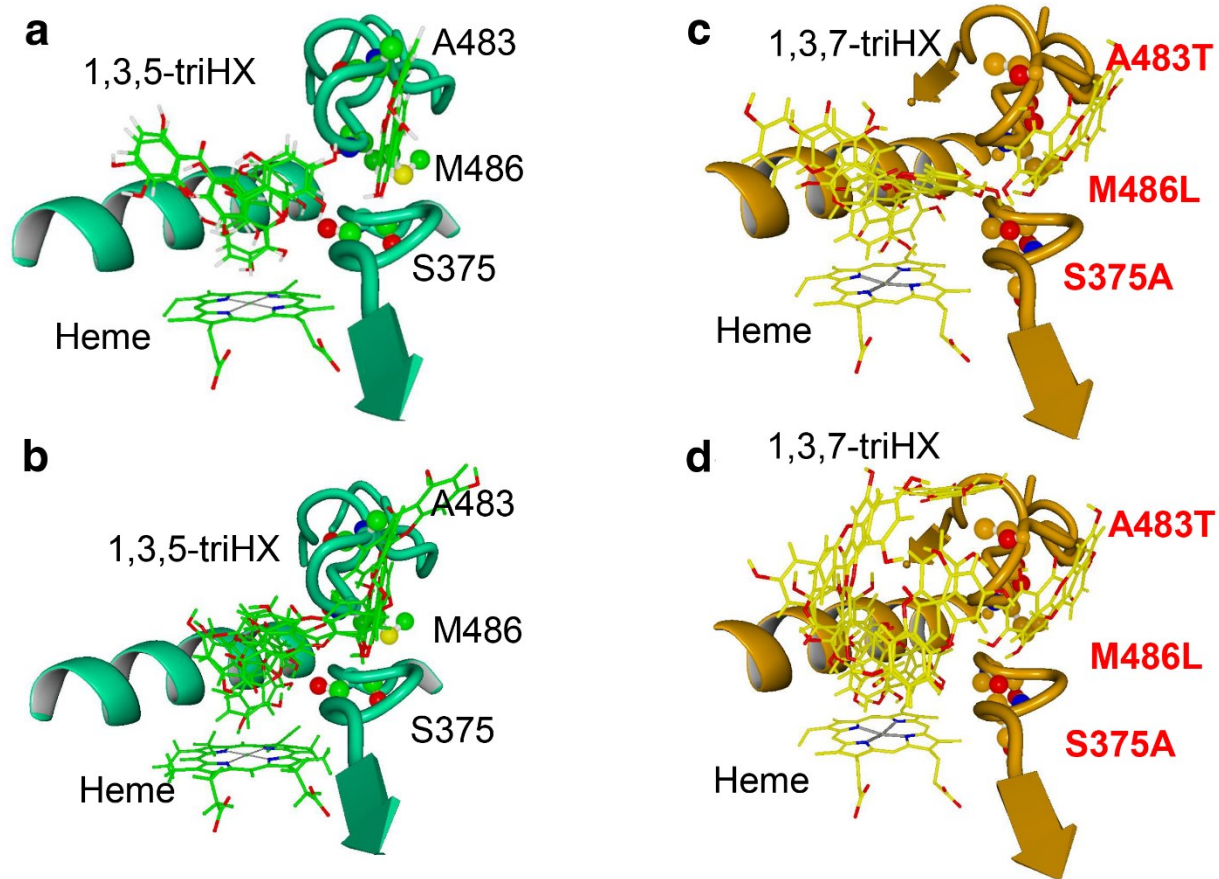

**Supplementary Figure 12 | Automated product docking using AUTODOCK VINA.** The active sites of wild-type CYP81AA2 (lime) with bound 1,3,5-triHX (green sticks) and the sextuple mutant (mut6) of CYP81AA2 (orange) with bound 1,3,7-triHX (yellow sticks) are illustrated. (a) CYP81AA2 1,3,5-triHX docking with rigid receptor, overlay of 7 clusters representing 25 docking results. (b) CYP81AA2 1,3,5-triHX docking with flexible receptor sidechains, overlay of 9 clusters representing 100 docking results. (c) CYP81AA2(mut6) 1,3,7-triHX docking with rigid receptor, overlay of 8 clusters representing 25 docking results. (d) CYP81AA2(mut6) 1,3,7-triHX docking with flexible receptor sidechains, overlay of 12 clusters representing 100 docking results.

**Supplementary Table 1 | CYP contigs identified in a *H. calycinum* SSH library.**

| <b>Contig number</b> | <b>Number of copies</b> | <b>Closest NCBI match</b> | <b>Closest MPGR<sup>a</sup> match (% identity)</b> |
|----------------------|-------------------------|---------------------------|----------------------------------------------------|
| 21                   | 22                      | CYP81C                    | hpa_locus_416 (95.0)                               |
| 41                   | 7                       | CYP81C                    | hpa_locus_416 (91.6)                               |
| 50                   | 11                      | CYP81C                    | hpa_locus_416 (97.2)                               |
| 56                   | 2                       | CYP71A                    | hpa_locus_18081 (98.2)                             |
| 59                   | 33                      | CYP81C                    | hpa_locus_416 (97.3)                               |
| 62                   | 36                      | CYP72A                    | hpa_locus_60 (78.2)                                |
| 86                   | 3                       | CYP81D                    | hpa_locus_12223 (70.8)                             |
| 103                  | 2                       | CYP81C                    | hpa_locus_416 (97.4)                               |
| 110                  | 3                       | CYP81C                    | hpa_locus_416 (97.2)                               |
| 158                  | 2                       | CYP706                    | hpa_locus_19031 (81.9)                             |
| 181                  | 3                       | CYP706                    | hpa_locus_19031 (82.2)                             |
| 199                  | 3                       | CYP81D                    | hpa_locus_13843 (89.7)                             |
| 219                  | 5                       | CYP81C                    | hpa_locus_416 (92.0)                               |

<sup>a</sup> Medicinal Plant Genomics Resource (<http://medicinalplantgenomics.msu.edu>)

**Supplementary Table 2** | Product profiles of CYP81AA1 and CYP81AA2<sup>a</sup>.

| Substrate                                                                                                  | Product(s)                                                                                               |                                                                                                                                  |                                                                                                                                                |
|------------------------------------------------------------------------------------------------------------|----------------------------------------------------------------------------------------------------------|----------------------------------------------------------------------------------------------------------------------------------|------------------------------------------------------------------------------------------------------------------------------------------------|
|                                                                                                            | CYP81AA1                                                                                                 | CYP81AA2                                                                                                                         |                                                                                                                                                |
| 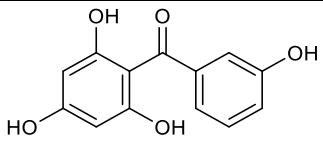<br>2,3',4,6-tetraHB      | <br>1,3,7-triHX         | <br>1,3,5-triHX                                | <br>1,3,7-triHX (minor)<br>+ unidentified product 1 (minor) |
| <br>2,4,6-triHB           | <br>2,3',4,6-tetraHB    | <br>2,3',4,6-tetraHB                           | <br>1,3,5-triHX<br>+ unidentified product 1 (minor)         |
| <br>2,4-diHB            | <br>2,3',4-triHB      | <br>2,3',4-triHB<br>+ unidentified product 2 | <br>2,2',3,4'-tetraHB                                     |
| <br>2,2',4,5'-tetraHB   | <br>2,2',4,5'-tetraHB |                                                                                                                                  |                                                                                                                                                |
| <br>2,3',4,4',6-pentaHB | <br>1,3,6,7-tetraHX   | <br>1,3,6,7-tetraHX                          |                                                                                                                                                |

<sup>a</sup> Non-accepted substrates are depicted in Supplementary Fig. 1

**Supplementary Table 3** | Product profile of CYP81AA3.

| Substrate                                                                                                 | Product                                                                                               | Substrate                                                                                               | Product |
|-----------------------------------------------------------------------------------------------------------|-------------------------------------------------------------------------------------------------------|---------------------------------------------------------------------------------------------------------|---------|
| 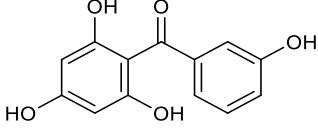<br>2,3',4,6-tetraHB     | n.d.                                                                                                  | <br>1,3-diHX          | n.d.    |
| <br>2,4,6-triHB          | n.d.                                                                                                  | <br>1,3,7-triHX       | n.d.    |
| <br>2,4-diHB             | n.d.                                                                                                  | <br>1,3,5-triHX       | n.d.    |
| <br>2,3',4,4',6-pentaHB | <br>1,3,6,7-tetraHX | <br>1,3,6,7-tetraHX  | n.d.    |
| <br>2-HB               | n.d.                                                                                                  | <br>1,3,5,6-tetraHX | n.d.    |
| <br>4-HB               | n.d.                                                                                                  |                                                                                                         |         |

n.d. = not detected



**Supplementary Table 4** | Contact residues located within a 4 Å radius of the bound inhibitor and their standard positions and SRS numbers. Divergent residues are highlighted in red.

| CYP81AA1 |          | CYP81AA2 |          | Standard numbering | SRS number |
|----------|----------|----------|----------|--------------------|------------|
| Residue  | Position | Residue  | Position | position           |            |
| PHE      | 110      | PHE      | 113      | 85                 | 1          |
| PHE      | 212      | PHE      | 215      | 181                | 2          |
| ILE      | 215      | ILE      | 218      | 184                | 2          |
| VAL      | 216      | VAL      | 219      | 185                | 2          |
| ILE      | 307      | ILE      | 309      | 263                | 4          |
| ALA      | 308      | ALA      | 310      | 264                | 4          |
| GLU      | 311      | GLU      | 313      | 267                | 4          |
| THR      | 312      | THR      | 314      | 268                | 4          |
| ALA      | 315      | ALA      | 317      | 271                | 4          |
| TYR      | 370      | TYR      | 372      | 325                | 5          |
| PRO      | 372      | PRO      | 374      | 327                | 5          |
| ALA      | 373      | SER      | 375      | 328                | 5          |
| LEU      | 377      | LEU      | 379      | 331                | 5          |
| THR      | 482      | MET      | 486      | 437/439            | 6          |
| ALA      | 483      | SER      | 487      | 437.3/440          | 6          |
| SER      | 484      | LYS      | 488      | 438/441            | 6          |
| LEU      | 485      | ASN      | 489      | 439/441.1          | 6          |

**Supplementary Table 5** | Product profiles of CYP81AA1 mutants.

| <b>Enzyme mutant</b>                                                        | <b>1,3,7-triHX</b>          | <b>1,3,5-triHX</b> |
|-----------------------------------------------------------------------------|-----------------------------|--------------------|
|                                                                             | <b>(% of total product)</b> |                    |
| Wild-type CYP81AA1                                                          | 100                         | 0                  |
| CYP81AA1-AA2                                                                | 100                         | 0                  |
| CYP81AA1 A373S                                                              | 94.9 ± 1.1                  | 5.1 ± 1.1          |
| CYP81AA1-AA2 A373S                                                          | 93.2 ± 0.2                  | 6.8 ± 0.2          |
| CYP81AA1 A373S/S376L                                                        | 95.0 ± 0.4                  | 5.0 ± 0.4          |
| CYP81AA1-AA2 A373S/S376L                                                    | 96.0 ± 0.8                  | 4.0 ± 0.8          |
| CYP81AA1 A373S/S376L/T482A                                                  | 95.5 ± 0.3                  | 4.5 ± 0.3          |
| CYP81AA1 A373S/S376L/T482A/L485M/R487K/K488N                                | 93.5 ± 0.6                  | 6.5 ± 0.6          |
| CYP81AA1 A373S/S376L/T482V                                                  | 94.6 ± 0.5                  | 5.4 ± 0.5          |
| CYP81AA1 A373S/S376L/T482F                                                  | 95.9 ± 0.3                  | 4.1 ± 0.3          |
| CYP81AA1 W113F/A373S/S376L/T482A                                            | 95.2 ± 0.1                  | 4.8 ± 0.1          |
| CYP81AA1 I220P/A373S/S376L/T482A                                            | 99.4 ± 0.1                  | 0.6 ± 0.1          |
| CYP81AA1<br>A373S/S376L/T482A/L485M/R487K/K488N/V302I/M303T                 | No activity detected        |                    |
| CYP81AA1<br>W113F/I220P/A373S/S376L/T482A/L485M/R487K/K488N/<br>V302I/M303T | No activity detected        |                    |

**Supplementary Table 6** | Accession numbers of the plant CPR sequences used to design CPR-dpF-1.

| <b>Name</b>                       | <b>Accession No.</b> | <b>Name</b>                     | <b>Accession No.</b> |
|-----------------------------------|----------------------|---------------------------------|----------------------|
| <i>Ammi majus</i> CPR2            | AY532374.1           | <i>Medicago truncatula</i> CPR2 | XM_003610061.1       |
| <i>Arabidopsis thaliana</i> CPR1  | NM_118585.3          | <i>Papaver somniferum</i> CPR1  | U67185.1             |
| <i>Arabidopsis thaliana</i> CPR2  | NM_179141.2          | <i>Petunia x hybrida</i> CPR2   | DQ099545.1           |
| <i>Artemisia annua</i> CPR2       | DQ984181.1           | <i>Populus trichocarpa</i> CPR1 | XM_002307300.2       |
| <i>Centaurium erythraea</i> CPR1  | AY596976.1           | <i>Populus trichocarpa</i> CPR2 | AF302497.1           |
| <i>Glycine max</i> CPR1           | NM_001249813.1       | <i>Populus trichocarpa</i> CPR3 | AF302498.1           |
| <i>Gossypium hirsutum</i> CPR1    | FJ719368.1           | <i>Triticum aestivum</i> CPR2   | AJ303373.1           |
| <i>Gossypium hirsutum</i> CPR2    | FJ719369.1           | <i>Zea mays</i> CPR2            | EU956822.1           |
| <i>Hypericum androsaemum</i> CPR1 | AY520902.1           | <i>Zingiber officinale</i> CPR1 | AB566408.1           |
| <i>Lotus japonicus</i> CPR2       | AB433810.1           | <i>Zingiber officinale</i> CPR2 | AB566409.1           |

**Supplementary Table 7** | List of primers used for core fragment amplification, RACE, qRT-PCR and cloning.

| Primer name                  | Sequence 5'→3'                       |
|------------------------------|--------------------------------------|
| Core fragments amplification |                                      |
| Contig59-F1                  | AAGGTCCCCGTCCTCGTTGTC                |
| Contig21-R1                  | CGTATTCCTCGAACCTCTC                  |
| CPR-dpF-1                    | GCNGARGGNTTYGCHAAGGC                 |
| CPR-R1                       | CTTGGACAATGGTGTGGAGAGTTC             |
| 3' and 5' RACE               |                                      |
| CYP81-3RACE1                 | TCCTAATGCAACACCCAGAG                 |
| CYP81-3RACE2                 | CTACCTAAGGGCCGTCGTGA                 |
| CYP81-5RACE1                 | CCGCTTCTCCTCCTTGGTGTCC               |
| CYP81-5RACE2                 | CGTCGTTCTTGGTGAAGCACTCCTC            |
| CPR-3RACE1                   | GCTCCATTCAGGGGTTTCC                  |
| CPR-3RACE2                   | GGTTAGCCCTGAAAGAATCC                 |
| CPR-5RACE1                   | ATCCATTTTCGGGCCACAATGCCTCTC          |
| CPR-5RACE2                   | TGCCTGTTCCCTAAGCCAAACACTGC           |
| 51544-3RACE1                 | GACGCCATGCGACTTCATCC                 |
| 51544-3RACE2                 | TCCTTAACGGCTTACTTGCCAATA             |
| qRT-PCR                      |                                      |
| Hc81AA1-qF                   | TCTCGATGACCGTATGTGACTT               |
| Hc81AA1-qR                   | CGTTAAGGAAGACCTCCCTCT                |
| HcCPR2-qF                    | TGACTATGCTGCGGATGATGAA               |
| HcCPR2-qR                    | GCCAAGAAGAGGACAACCAAATC              |
| HcBPS-qF                     | AAGGAAAGAAGAGGGCTAGTGT               |
| HcBPS-qR                     | ATGTGCTCGCTGTTAGTGTTT                |
| Actin-qF                     | CGGCAGTGGTTGTGAACAT                  |
| Actin-qR                     | TCTCGCTGGTCGTGATCTG                  |
| Histone-H2A-qF               | AACATCTACTCTTTGGACGACTTG             |
| Histone-H2A-qR               | AATTGCTGGAGGTGGAGTTATTC              |
| Cloning*                     |                                      |
| HcCPR2- <i>Bam</i> HI-F      | GTAATGGATCCGATGGAACCGACGGGGAGC       |
| HcCPR2- <i>Hind</i> III-R    | GTCTGAAGCTTTCACCATACGTCGCGAAGGTAC    |
| Hc81AA1- <i>Eco</i> RI-F     | ATTGAATTCGGATGGAGGACTTGTACTTGTACC    |
| Hc81AA1- <i>Pac</i> I-R      | ACGTTAATTAATTAGAGCTGGGAAAGGAGACC     |
| Hp81AA1- <i>Spe</i> I-F      | TATGACTAGTAATGGAGGACTTGTATCTGTACG    |
| Hp81AA1- <i>Pac</i> I-R      | ACGTTAATTAATTAGAGCTGGGAGAGGAGG       |
| Hp81AA2- <i>Eco</i> RI-F     | ATTGAATTCATGGACGGTTTATACTTAAACTAGCC  |
| Hp81AA2- <i>Pac</i> I-R      | ACGTTAATTAACTAGAGTTGGGAAAGGAGCTTG    |
| Hp81AA2- <i>Spe</i> I-F      | ATTACTAGTAATGGACGGTTTATACTTAAACTAGC  |
| Hp81AA3- <i>Spe</i> I-F      | TATGACTAGTAATGGAATTGTATTTGTATCTAGCCG |
| Hp81AA3- <i>Pac</i> I-R      | ACGTTAATTAACTAAGAGAGTAGAGAACTGAGG    |

\* Introduced restriction site sequences are underlined

**Supplementary Table 8** | Primers used for C-terminal exchanges and site-directed mutagenesis.

| Primer name                                                                           | Sequence 5'→3'                                |
|---------------------------------------------------------------------------------------|-----------------------------------------------|
| Overlapping primers used for C-terminal exchanges                                     |                                               |
| AA1-AA2-ex                                                                            | CGGAGGGATGGGGACCCACATTGTCTGCGAGACATTGGGAATG   |
| AA2-AA1-ex                                                                            | CCGGAATGGGAACCCATATCTCGTCCCTGGGGATTGGAATTCTTA |
| Primers used for site-directed mutagenesis (mutated positions are highlighted in red) |                                               |
| AA1-A373S-F                                                                           | CCGCCGTCCCCACTCTCCCTCCCCACTTCTCCAACCAAG       |
| AA1-A373S-R                                                                           | GTGGGGACGGCGGGTACATCCTGAGCGTCTCCTTCACGAC      |
| AA1-ASSL-F                                                                            | CGCCGTCCCCACTCTTGTCTCCCCACTTCTCCAACCAAG       |
| AA1-T482V-F                                                                           | AGCCACGCGCGTGGTGTCTCGCGAGTCTGTCAAGGAAGAAG     |
| AA1-T482F-F                                                                           | AGCCACGCGCGTGGTTTCTCGCGAGTCTGTCAAGGAAGAAG     |
| AA1-T482uni-R                                                                         | ACGCGCGTGGCTCATGTCCTCGTCCATGCCGAGGTGGC        |
| AA1-T482A-F                                                                           | CGTGGTGCCGCGAGTCTGTCAAGGAAGAAGCCATTGGAG       |
| AA1-T482A-R                                                                           | TCGCGGCACCACGCGCGTGGCTCATGTCCTCGTCCATGC       |
| AA1-TALMRKKN-F                                                                        | CGTGGTGCCGCGAGTATGTCAAAGAACAAGCCATTGGAG       |
| AA1-VIMT-F                                                                            | GAATTATTACGATGATGTTTATTGCCGGGACCGAGACG        |
| AA1-VIMT-R                                                                            | TCATCGTAATAATTCCCTTGACGATGTCATCCGTG           |
| AA1-W113F-F                                                                           | TCGTGTTCGCCCCGCACGGCCCCATCTGGAAGAGCCTC        |
| AA1-W113F-R                                                                           | GGGGCGAACACGAGGAAGGTGTAGTCGTAGGTGAGGTGC       |
| AA1-I220P-F                                                                           | ATGACCCCATGCGACTTCATCCCGGTGATGAGGCTGATC       |
| AA1-I220P-R                                                                           | TCGCATGGGGTCATGGAGACGATAGGAAAGAAGAGATCC       |
| AA2-A483T-F                                                                           | GCCGGTACGGCTAGTATGTCCAAGAACAAGCCATTGG         |
| AA2-A483T-R                                                                           | TAGCCGTACCGGCTTGGTGGGTCATGTCCTCGTCCATAC       |
| AA2-ATMLKRNK-F                                                                        | GCCGGTACGGCTAGTCTGTCCAAGGAAGAAGCCATTGG        |
| AA2-L378S-F                                                                           | CGCTCTCGCTACCTCGTTATTCGAGCGAGGCTTGCAC         |
| AA2-L378S-R                                                                           | GGTAGCGAGAGCGGGGACGGAGGATACAGCCTCATCGTC       |
| AA2-S375A-F                                                                           | CCTCCGGCCCCGCTCTTGCTACCTCGTTATTCGAGCGAG       |
| AA2-S375A-R                                                                           | GCGGGGCGGAGGATACAGCCTCATCGTCTCCTTCACG         |
| AA2-SALS-F                                                                            | CCTCCGGCCCCGCTCTCGCTACCTCGTTATTCGAGCGAG       |

**Supplementary Table 9** | Templates and primers used to generate mutations.

| Template                                                  | Primers                       | Mutant                                                          |
|-----------------------------------------------------------|-------------------------------|-----------------------------------------------------------------|
| <b>Mutants of CYP81AA1</b>                                |                               |                                                                 |
| Wild-type CYP81AA1                                        | AA1-A373S-F<br>AA1-A373S-R    | A373S                                                           |
| AA1-AA2                                                   | AA1-A373S-F<br>AA1-A373S-R    | AA1-AA2 A373S                                                   |
| A373S                                                     | AA1-AS-SL-F<br>AA1-A373S-R    | A373S/S376L                                                     |
| AA1-AA2 A373S                                             | AA1-AS-SL-F<br>AA1-A373S-R    | AA1-AA2 A373S/S376L                                             |
| A373S/S376L                                               | AA1-T482A-F<br>AA1-T482A-R    | A373S/S376L/T482A                                               |
| A373S/S376L                                               | AA1-TALMRKKN-F<br>AA1-T482A-R | A373S/S376L/T482A/L485M/R487K/<br>K488N                         |
| A373S/S376L                                               | AA1-T482V-F<br>AA1-T482uni-R  | A373S/S376L/T482V                                               |
| A373S/S376L                                               | AA1-T482F-F<br>AA1-T482uni-R  | A373S/S376L/T482F                                               |
| A373S/S376L/T482A                                         | AA1-W113F-F<br>AA1-W113F-R    | W113F/A373S/S376L/T482A                                         |
| CYP81AA1 A373S/S376L/T482A                                | AA1-I220P-F<br>AA1-I220P-R    | I220P/A373S/S376L/T482A                                         |
| A373S/S376L/T482A/L485M/R487<br>K/K488N                   | AA1-VIMT-F<br>AA1-VIMT-R      | A373S/S376L/T482A/L485M/R487K/<br>K488N/V302I/M303T             |
| A373S/S376L/T482A/L485M/R487<br>K/K488N/V302I/M303T       | AA1-W113F-F<br>AA1-W113F-R    | W113F/A373S/S376L/T482A/L485M/<br>R487K/K488N/V302I/M303T       |
| W113F/A373S/S376L/T482A/L485<br>M/R487K/K488N/V302I/M303T | AA1-I220P-F<br>AA1-I220P-R    | W113F/I220P/A373S/S376L/T482A/<br>L485M/R487K/K488N/V302I/M303T |
| <b>Mutants of CYP81AA2</b>                                |                               |                                                                 |
| Wild-type CYP81AA2                                        | AA2-S375A-F<br>AA2-S375A-R    | S375A                                                           |
| Wild-type CYP81AA2                                        | AA2-L378S-F<br>AA2-L378S-R    | L378S                                                           |
| Wild-type CYP81AA2                                        | AA2-A483T-F<br>AA2-A483T-R    | A483T                                                           |
| S375A                                                     | AA2-SALS-F<br>AA2-S375A-F     | S375A/L378S                                                     |
| S375A                                                     | AA2-A483T-F<br>AA2-A483T-R    | S375A/A483T                                                     |
| L378S                                                     | AA2-A483T-F<br>AA2-A483T-R    | L378S/A483T                                                     |
| S375A/L378S                                               | AA2-A483T-F<br>AA2-A483T-R    | S375A/L378S/A483T                                               |
| S375A/L378S                                               | AA2-ATMLKRNK-F<br>AA2-A483T-R | S375A/L378S/A483T/M486L/K488R/<br>N489K                         |

## Supplementary Methods

**Synthesis of standards.** 1,3,7-Trihydroxyxanthone, 1,3,5-trihydroxyxanthone, and 1,3,5,6-tetrahydroxyxanthone were synthesized by the Grover, Shah and Shah method<sup>1,2</sup>. 2,2',3,4'-Tetrahydroxybenzophenone and 2,2',4,5'-tetrahydroxybenzophenone were prepared in the laboratory of Prof. Dr. Qidong You, Pharmaceutical University, Nanjing, China<sup>3</sup>. 2,3',4,6-Tetrahydroxybenzophenone and 1,3-dihydroxyxanthone were from our laboratory collection<sup>4</sup>. 1,3,6,7-Tetrahydroxyxanthone was isolated from *H. perforatum in vitro* roots as previously reported<sup>5</sup>. All other chemicals were commercially available.

## Supplementary References

1. Genoux-Bastide, E. et al. Identification of xanthenes as selective killers of cancer cells overexpressing the ABC transporter MRP1. *ChemMedChem* **6**, 1478-84 (2011).
2. Grover, P.K., Shah, G.D. & Shah, R.C. Xanthenes. Part IV. A new synthesis of hydroxyxanthenes and hydroxybenzophenones. *J. Chem. Soc.*, 3982-3985 (1955).
3. Zhang, X.-J. et al. Microwave-assisted efficient and green synthesis of hydroxyxanthone in water. *Synth. Commun.* **42**, 2952-2958 (2012).
4. Schmidt, W., Peters, S. & Beerhues, L. Xanthone 6-hydroxylase from cell cultures of *Centaurium erythraea* RAFN and *Hypericum androsaemium* L. *Phytochemistry* **53**, 427-431 (2000).
5. Tocci, N. et al. A three-step culture system to increase the xanthone production and antifungal activity of *Hypericum perforatum* subsp. *angustifolium* *in vitro* roots. *Plant Physiol. Biochem.* **57**, 54-8 (2012).
