# Supplementary material for: Bifunctional CYP81AA proteins catalyse identical hydroxylations but alternative regioselective phenol couplings in plant xanthone biosynthesis
Source: PubMed Central journal article supplement (PMC4858744; doi:10.1038/ncomms11472), 2016-05-05
Supplement: ncomms11472-s2.pdf [file ncomms11472-s2.pdf]

a)CYP81AA2 rigid receptor, all 25 docking results

Global docking result analysis

25 VINA docking runs of the ligand object 2 to the receptor object 1 yielded the following results, sorted by binding energy [more positive energies indicate stronger binding, and negative energies mean no binding]

| Run                                                                 | Bind.energy[kcal/mol] | Dissoc. constant [pM] | Contacting receptor residues                                |
|---------------------------------------------------------------------|-----------------------|-----------------------|-------------------------------------------------------------|
| 001                                                                 | 000007.9230           | 00000001557270.2500   | PHE 116 ILE 218 VAL 219 MET 306 ILE 309 ALA 310 THR 314 SER |
| 375 LEU 378 LEU 379 CYS 445 ALA 484 SER 485 HEM A 600               |                       |                       |                                                             |
| 002                                                                 | 000007.9230           | 00000001557270.2500   | PHE 116 ILE 218 VAL 219 MET 306 ILE 309 ALA 310 THR 314 SER |
| 375 LEU 378 LEU 379 CYS 445 ALA 484 SER 485 HEM A 600               |                       |                       |                                                             |
| 003                                                                 | 000007.7130           | 00000002219709.0000   | VAL 115 PHE 116 ILE 218 VAL 219 MET 306 ALA 310 THR 314 SER |
| 375 LEU 378 LEU 379 CYS 445 ALA 484 SER 485 HEM A 600               |                       |                       |                                                             |
| 004                                                                 | 000007.7130           | 00000002219709.0000   | VAL 115 PHE 116 ILE 218 VAL 219 MET 306 ALA 310 THR 314 SER |
| 375 LEU 378 LEU 379 CYS 445 ALA 484 SER 485 HEM A 600               |                       |                       |                                                             |
| 005                                                                 | 000007.5570           | 00000002888321.7500   | PHE 116 PHE 215 ILE 218 MET 306 ILE 309 ALA 310 THR 314 PRO |
| 374 SER 375 LEU 379 CYS 445 ALA 484 SER 485 MET 486 HEM A 600       |                       |                       |                                                             |
| 006                                                                 | 000007.5570           | 00000002888321.7500   | PHE 116 PHE 215 ILE 218 MET 306 ILE 309 ALA 310 THR 314 PRO |
| 374 SER 375 LEU 379 CYS 445 ALA 484 SER 485 MET 486 HEM A 600       |                       |                       |                                                             |
| 007                                                                 | 000007.5200           | 00000003074446.2500   | VAL 115 PHE 116 PHE 215 ILE 218 MET 306 ILE 309 GLU 313 THR |
| 314 ALA 317 PRO 374 SER 375 LEU 379 SER 485 MET 486                 |                       |                       |                                                             |
| 008                                                                 | 000007.5200           | 00000003074446.2500   | VAL 115 PHE 116 PHE 215 ILE 218 MET 306 ILE 309 GLU 313 THR |
| 314 ALA 317 PRO 374 SER 375 LEU 379 SER 485 MET 486                 |                       |                       |                                                             |
| 009                                                                 | 000007.3530           | 00000004075487.2500   | VAL 115 PHE 116 PHE 215 ILE 218 MET 306 ALA 310 THR 314 SER |
| 375 LEU 379 CYS 445 ALA 484 SER 485 HEM A 600                       |                       |                       |                                                             |
| 010                                                                 | 000007.3530           | 00000004075487.2500   | VAL 115 PHE 116 PHE 215 ILE 218 MET 306 ALA 310 THR 314 SER |
| 375 LEU 379 CYS 445 ALA 484 SER 485 HEM A 600                       |                       |                       |                                                             |
| 011                                                                 | 000007.3310           | 00000004229663.0000   | LEU 107 PHE 113 VAL 115 PHE 116 LEU 214 PHE 215 ILE 218 ARG |
| 249 THR 305 MET 306 ILE 309 THR 314 SER 375 LEU 379 SER 485         |                       |                       |                                                             |
| 012                                                                 | 000007.1980           | 00000005294147.5000   | VAL 115 PHE 116 ILE 218 MET 306 ILE 309 ALA 310 THR 314 SER |
| 375 LEU 379 CYS 445 HEM A 600                                       |                       |                       |                                                             |
| 013                                                                 | 000007.1790           | 00000005466674.5000   | LEU 107 PHE 113 VAL 115 PHE 116 LEU 214 PHE 215 ILE 218 ARG |
| 249 MET 306 ILE 309 GLU 313 THR 314 SER 375 LEU 379 SER 485         |                       |                       |                                                             |
| 014                                                                 | 000007.0950           | 00000006299354.5000   | VAL 115 PHE 116 PHE 215 ILE 218 MET 306 ILE 309 GLU 313 THR |
| 314 ALA 317 PRO 374 SER 375 LEU 379 SER 485 MET 486                 |                       |                       |                                                             |
| 015                                                                 | 000007.0760           | 00000006504639.5000   | LEU 51 TYR 52 SER 375 PRO 376 LEU 377 LEU 378 LEU 379 PRO   |
| 380 MET 399 LEU 401 GLY 482 ALA 483 ALA 484 MET 486                 |                       |                       |                                                             |
| 016                                                                 | 000007.0360           | 00000006958948.5000   | LEU 107 THR 108 PHE 113 VAL 115 PHE 116 LEU 214 PHE 215 ILE |
| 218 ARG 249 THR 305 MET 306 ILE 309 ALA 310 GLU 313 THR 314 LEU 379 |                       |                       |                                                             |
| 017                                                                 | 000007.0260           | 00000007077399.5000   | VAL 115 PHE 116 PHE 215 ILE 218 MET 306 ALA 310 THR 314 PRO |
| 374 SER 375 LEU 379 CYS 445 ALA 484 SER 485 HEM A 600               |                       |                       |                                                             |
| 018                                                                 | 000006.8570           | 00000009413527.0000   | PHE 116 PHE 215 ILE 218 ILE 309 GLU 313 THR 314 SER 375 LEU |
| 378 LEU 379 PRO 380 SER 485                                         |                       |                       |                                                             |

```

019 |          000006.8020 | 00000010329229.0000 | VAL  115 PHE  116 ILE  218 VAL  219 MET  306 ILE  309 ALA  310 THR
314 SER  375 LEU  378 LEU  379 PRO  380 SER  485
020 |          000006.6950 | 00000012373710.0000 | VAL  115 PHE  116 PHE  215 ILE  218 MET  306 ILE  309 ALA  310 GLU
313 THR  314 LEU  379 CYS  445 HEM A 600
021 |          000006.6820 | 00000012648210.0000 | ILE  46 LEU  51 VAL  219 SER  375 PRO  376 LEU  377 LEU  378 PRO
380 ALA  483 ALA  484 SER  485 MET  486
022 |          000006.6490 | 00000013372678.0000 | VAL  115 PHE  116 PHE  215 ILE  218 MET  306 ILE  309 THR  314 PRO
374 SER  375 LEU  379 SER  485 HEM A 600
023 |          000006.6480 | 00000013395267.0000 | PHE  116 PHE  215 ILE  218 ILE  309 ALA  310 GLU  313 THR  314 SER
375 LEU  378 LEU  379 PRO  380 SER  485
024 |          000006.5540 | 00000015698361.0000 | VAL  115 PHE  116 PHE  215 ILE  218 VAL  219 MET  306 ILE  309 ALA
310 GLU  313 THR  314 LEU  379 ALA  484 SER  485 HEM A 600
025 |          000006.4300 | 00000019352964.0000 | PHE  116 PHE  215 ILE  218 ILE  309 ALA  310 GLU  313 THR  314 PRO
374 SER  375 LEU  377 LEU  378 LEU  379 PRO  380 ALA  484 SER  485 MET  486

```

After clustering the 25 runs, the following 7 distinct complex conformations were found:  
[They all differ by at least 5.0 A heavy atom RMSD]

Clu |Bind.energy[kcal/mol]|Dissoc. constant [pM]| Contacting receptor residues

```

-----+-----+-----+-----
001 |          000007.9230 | 00000001557270.2500 | PHE  116 ILE  218 VAL  219 MET  306 ILE  309 ALA  310 THR  314 SER
375 LEU  378 LEU  379 CYS  445 ALA  484 SER  485 HEM A 600
002 |          000007.7130 | 00000002219709.0000 | VAL  115 PHE  116 ILE  218 VAL  219 MET  306 ALA  310 THR  314 SER
375 LEU  378 LEU  379 CYS  445 ALA  484 SER  485 HEM A 600
003 |          000007.5200 | 00000003074446.2500 | VAL  115 PHE  116 PHE  215 ILE  218 MET  306 ILE  309 GLU  313 THR
314 ALA  317 PRO  374 SER  375 LEU  379 SER  485 MET  486
004 |          000007.3310 | 00000004229663.0000 | LEU  107 PHE  113 VAL  115 PHE  116 LEU  214 PHE  215 ILE  218 ARG
249 THR  305 MET  306 ILE  309 THR  314 SER  375 LEU  379 SER  485
005 |          000007.0760 | 00000006504639.5000 | LEU  51 TYR  52 SER  375 PRO  376 LEU  377 LEU  378 LEU  379 PRO
380 MET  399 LEU  401 GLY  482 ALA  483 ALA  484 MET  486
006 |          000007.0360 | 00000006958948.5000 | LEU  107 THR  108 PHE  113 VAL  115 PHE  116 LEU  214 PHE  215 ILE
218 ARG  249 THR  305 MET  306 ILE  309 ALA  310 GLU  313 THR  314 LEU  379
007 |          000006.6820 | 00000012648210.0000 | ILE  46 LEU  51 VAL  219 SER  375 PRO  376 LEU  377 LEU  378 PRO
380 ALA  483 ALA  484 SER  485 MET  486

```

b) CYP81AA2 flexible receptor sidechains, all 100 docking results

Ensemble docking result analysis

=====

The ligand was docked 20 times ["Run"] with VINA against each of the 5 receptors ["Rec"] in the ensemble, yielding the following 100 results, sorted by binding energy:

[More positive energies indicate stronger binding, and negative energies mean no binding]

| Rec | Run     | Bind.energy[kcal/mol] | Dissoc. constant [pM] | Contacting receptor residues                            |
|-----|---------|-----------------------|-----------------------|---------------------------------------------------------|
| 002 | 001     | 000008.2560           | 00000000887711.3125   | VAL 115 PHE 116 PHE 215 ILE 218 MET 306 ILE 309 ALA 310 |
| THR | 314 PRO | 374 SER 375 LEU       | 379 CYS 445 ALA       | 484 SER 485 MET 486 HEM A 600                           |
| 005 | 001     | 000008.2050           | 00000000967509.5625   | VAL 115 PHE 116 PHE 215 ILE 218 ILE 309 ALA 310 THR 314 |
| PRO | 374 SER | 375 LEU 379 CYS       | 445 ALA 484 SER       | 485 MET 486 HEM A 600                                   |
| 003 | 001     | 000008.0680           | 00000001219207.3750   | VAL 115 PHE 116 PHE 215 ILE 218 MET 306 ILE 309 ALA 310 |
| THR | 314 PRO | 374 SER 375 LEU       | 379 CYS 445 ALA       | 484 SER 485 MET 486 HEM A 600                           |
| 004 | 001     | 000007.9640           | 00000001453150.5000   | PHE 215 ILE 218 ILE 309 ALA 310 THR 314 PRO 374 SER 375 |
| CYS | 445 ALA | 484 SER 485 MET       | 486 HEM A 600         |                                                         |
| 005 | 002     | 000007.9390           | 00000001515778.8750   | VAL 115 PHE 116 PHE 215 ILE 218 MET 306 ILE 309 GLU 313 |
| THR | 314 ALA | 317 PRO 374 SER       | 375 LEU 379 SER       | 485                                                     |
| 001 | 001     | 000007.9190           | 00000001567819.3750   | VAL 115 PHE 116 ILE 218 VAL 219 MET 306 ILE 309 ALA 310 |
| THR | 314 SER | 375 LEU 378 LEU       | 379 CYS 445 ALA       | 484 SER 485 HEM A 600                                   |
| 005 | 003     | 000007.8210           | 00000001849826.5000   | VAL 115 PHE 116 PHE 215 ILE 218 VAL 219 MET 306 ILE 309 |
| ALA | 310 THR | 314 SER 375 LEU       | 378 LEU 379 CYS       | 445 ALA 484 SER 485 HEM A 600                           |
| 004 | 002     | 000007.8170           | 00000001862357.3750   | VAL 115 PHE 116 ILE 218 MET 306 ALA 310 THR 314 PRO 374 |
| SER | 375 LEU | 379 CYS 445 HEM A 600 |                       |                                                         |
| 005 | 004     | 000007.7460           | 00000002099455.7500   | VAL 115 PHE 116 PHE 215 ILE 218 MET 306 ALA 310 THR 314 |
| PRO | 374 SER | 375 LEU 379 ALA       | 484 SER 485 HEM A 600 |                                                         |
| 001 | 002     | 000007.7200           | 00000002193638.0000   | VAL 115 PHE 116 ILE 218 VAL 219 MET 306 ALA 310 THR 314 |
| PRO | 374 SER | 375 LEU 378 LEU       | 379 CYS 445 ALA       | 484 SER 485 HEM A 600                                   |
| 003 | 002     | 000007.7140           | 00000002215965.7500   | VAL 115 PHE 116 PHE 215 ILE 218 MET 306 ALA 310 THR 314 |
| PRO | 374 SER | 375 LEU 379 CYS       | 445 ALA 484 SER       | 485 HEM A 600                                           |
| 002 | 002     | 000007.6980           | 00000002276623.2500   | VAL 115 PHE 116 PHE 215 ILE 218 MET 306 ALA 310 THR 314 |
| PRO | 374 SER | 375 LEU 379 CYS       | 445 ALA 484 SER       | 485 HEM A 600                                           |
| 004 | 003     | 000007.6310           | 00000002549193.7500   | VAL 115 PHE 116 PHE 215 ILE 218 MET 306 ALA 310 THR 314 |
| PRO | 374 SER | 375 LEU 379 CYS       | 445 ALA 484 SER       | 485 HEM A 600                                           |
| 005 | 005     | 000007.6150           | 00000002618972.7500   | VAL 115 PHE 116 ILE 218 VAL 219 MET 306 ALA 310 SER 375 |
| LEU | 378 LEU | 379 CYS 445 ALA       | 484 SER 485 HEM A 600 |                                                         |
| 001 | 003     | 000007.5550           | 00000002898088.0000   | VAL 115 PHE 116 PHE 215 ILE 218 MET 306 ALA 310 THR 314 |
| PRO | 374 SER | 375 LEU 379 CYS       | 445 ALA 484 SER       | 485 MET 486 HEM A 600                                   |
| 004 | 004     | 000007.5550           | 00000002898088.0000   | VAL 115 PHE 116 PHE 215 ILE 218 MET 306 ALA 310 THR 314 |
| PRO | 374 SER | 375 LEU 379 SER       | 485 HEM A 600         |                                                         |
| 001 | 004     | 000007.5170           | 00000003090053.0000   | VAL 115 PHE 116 PHE 215 ILE 218 MET 306 ILE 309 GLU 313 |
| THR | 314 ALA | 317 PRO 374 SER       | 375 LEU 379 SER       | 485 MET 486                                             |







```

001 | 013 |      000006.3100 | 00000023697836.0000 | PHE  215 ILE  218 VAL  219 ILE  309 ALA  310 GLU  313 THR  314
SER  375 LEU  378 LEU  379 PRO  380 ALA  484 SER  485
002 | 015 |      000006.2560 | 00000025959194.0000 | LEU  51 TYR  52 PHE  116 VAL  219 SER  375 PRO  376 LEU  377
LEU  378 LEU  379 PRO  380 ALA  483 ALA  484
002 | 016 |      000006.2550 | 00000026003044.0000 | LEU  51 PHE  116 ILE  218 VAL  219 SER  375 PRO  376 LEU  377
LEU  378 LEU  379 ALA  484
001 | 014 |      000006.2230 | 00000027446092.0000 | VAL  115 PHE  116 PHE  215 ILE  218 MET  306 ILE  309 ALA  310
THR  314 PRO  374 SER  375 LEU  377 LEU  378 LEU  379 PRO  380 ALA  484 SER  485 MET  486
002 | 017 |      000006.2170 | 00000027725448.0000 | ILE  46 LEU  51 TYR  52 VAL  219 SER  375 PRO  376 LEU  377 LEU
378 ALA  483 ALA  484 SER  485 MET  486
003 | 018 |      000006.1790 | 00000029561940.0000 | LEU  51 PHE  116 PHE  215 ILE  218 VAL  219 SER  375 PRO  376
LEU  377 LEU  378 LEU  379 PRO  380 ALA  484 SER  485
001 | 015 |      000006.1740 | 00000029812472.0000 | LEU  51 VAL  115 PHE  116 ILE  218 VAL  219 SER  375 PRO  376
LEU  377 LEU  378 LEU  379 ALA  484
001 | 016 |      000006.1690 | 00000030065128.0000 | LEU  51 VAL  115 PHE  116 MET  306 PRO  374 SER  375 PRO  376
LEU  377 LEU  378 LEU  379 PRO  380 ALA  484 SER  485 MET  486
001 | 017 |      000006.1680 | 00000030115914.0000 | VAL  115 PHE  116 PHE  215 MET  306 ILE  309 ALA  310 GLU  313
THR  314 ALA  317 PRO  374 SER  375 LEU  379 SER  485 MET  486 HEM A 600
002 | 018 |      000006.1590 | 00000030576878.0000 | ILE  46 LYS  47 PRO  48 GLY  49 PRO  50 LEU  51 VAL  219 PHE
226 ALA  483 ALA  484
003 | 019 |      000006.1550 | 00000030784010.0000 | ILE  46 LYS  47 PRO  48 GLY  49 PRO  50 LEU  51 VAL  219 ALA
483 ALA  484 SER  485
001 | 018 |      000006.1100 | 00000033213192.0000 | LEU  51 THR  101 PHE  116 ILE  218 VAL  219 PRO  374 SER  375
PRO  376 LEU  377 LEU  378 LEU  379 PRO  380 ALA  484 SER  485 MET  486
002 | 019 |      000006.1100 | 00000033213192.0000 | ILE  46 LEU  51 TYR  52 VAL  219 PRO  374 SER  375 PRO  376 LEU
377 LEU  378 GLY  482 ALA  483 ALA  484 SER  485 MET  486
002 | 020 |      000006.1010 | 00000033721564.0000 | LEU  51 PHE  116 ILE  218 VAL  219 PRO  374 SER  375 PRO  376
LEU  377 LEU  378 LEU  379 PRO  380 ALA  484 SER  485 MET  486
003 | 020 |      000006.0880 | 00000034469648.0000 | PHE  116 PHE  215 ILE  218 MET  306 ILE  309 ALA  310 GLU  313
THR  314 PRO  374 SER  375 PRO  376 LEU  377 LEU  378 LEU  379 PRO  380 ALA  484 SER  485 MET  486
001 | 019 |      000006.0620 | 00000036015968.0000 | VAL  115 PHE  116 LEU  214 PHE  215 ILE  218 MET  306 ILE  309
GLU  313 THR  314 PRO  374 SER  375 LEU  379 SER  485 MET  486
001 | 020 |      000006.0360 | 00000037631656.0000 | VAL  115 PHE  116 ILE  218 VAL  219 MET  306 ILE  309 ALA  310
SER  375 LEU  378 LEU  379 ALA  484

```

After clustering the 100 runs, the following 9 distinct complex conformations were found:

[They all differ by at least 5.0 A heavy ligand atom RMSD, and have been saved as YOb files with terminal number "Num"]

```

Num | Rec | Run | Bind.energy[kcal/mol] | Dissoc. constant [pM] | Contacting receptor residues
-----+-----+-----+-----+-----+-----
001 | 002 | 001 |      000008.2560 | 00000000887711.3125 | VAL  115 PHE  116 PHE  215 ILE  218 MET  306 ILE  309 ALA
310 THR  314 PRO  374 SER  375 LEU  379 CYS  445 ALA  484 SER  485 MET  486 HEM A 600
002 | 001 | 002 |      000007.7200 | 00000002193638.0000 | VAL  115 PHE  116 ILE  218 VAL  219 MET  306 ALA  310 THR
314 PRO  374 SER  375 LEU  378 LEU  379 CYS  445 ALA  484 SER  485 HEM A 600

```





c)CYP81AA2(mut6) rigid receptor, all 25 docking results

Global docking result analysis

25 VINA docking runs of the ligand object 2 to the receptor object 1 yielded the following results, sorted by binding energy [more positive energies indicate stronger binding, and negative energies mean no binding]

| Run                  | Bind.energy[kcal/mol]            | Dissoc. constant [pM]                                        | Contacting receptor residues                                |
|----------------------|----------------------------------|--------------------------------------------------------------|-------------------------------------------------------------|
| 001  <br>314 PRO     | 000008.4470  <br>374 ALA 375 LEU | 00000000643082.8125  <br>379 SER 485 HEM A 600               | VAL 115 PHE 116 PHE 215 THR 305 MET 306 ILE 309 ALA 310 THR |
| 002  <br>314 PRO     | 000008.4470  <br>374 ALA 375 LEU | 00000000643082.8125  <br>379 SER 485 HEM A 600               | VAL 115 PHE 116 PHE 215 THR 305 MET 306 ILE 309 ALA 310 THR |
| 003  <br>306 ILE     | 000008.2310  <br>309 ALA 310 LEU | 00000000925970.1875  <br>379 HEM A 600                       | VAL 115 PHE 116 LEU 214 PHE 215 ILE 218 ARG 249 THR 305 MET |
| 004  <br>306 ILE     | 000008.2310  <br>309 ALA 310 LEU | 00000000925970.1875  <br>379 HEM A 600                       | VAL 115 PHE 116 LEU 214 PHE 215 ILE 218 ARG 249 THR 305 MET |
| 005  <br>305 MET     | 000008.0280  <br>306 ILE 309 ALA | 00000001304361.5000  <br>310 THR 314 ALA 484                 | LEU 107 VAL 115 LEU 214 PHE 215 ILE 218 ILE 243 ARG 249 THR |
| 006  <br>305 MET     | 000008.0280  <br>306 ILE 309 ALA | 00000001304361.5000  <br>310 THR 314 ALA 484                 | LEU 107 VAL 115 LEU 214 PHE 215 ILE 218 ILE 243 ARG 249 THR |
| 007  <br>305 MET     | 000008.0100  <br>306 ILE 309 ALA | 00000001344597.0000  <br>310 LEU 379 HEM A 600               | LEU 107 VAL 115 LEU 214 PHE 215 ILE 218 ILE 243 ARG 249 THR |
| 008  <br>305 MET     | 000008.0100  <br>306 ILE 309 ALA | 00000001344597.0000  <br>310 LEU 379 HEM A 600               | LEU 107 VAL 115 LEU 214 PHE 215 ILE 218 ILE 243 ARG 249 THR |
| 009  <br>218 ILE     | 000008.0030  <br>243 ARG 249 THR | 00000001360577.2500  <br>305 MET 306 ILE 309 ALA 310 THR 314 | LEU 107 THR 108 PHE 113 VAL 115 PHE 116 LEU 214 PHE 215 ILE |
| 010  <br>218 ILE     | 000008.0030  <br>243 ARG 249 THR | 00000001360577.2500  <br>305 MET 306 ILE 309 ALA 310 THR 314 | LEU 107 THR 108 PHE 113 VAL 115 PHE 116 LEU 214 PHE 215 ILE |
| 011  <br>305 MET     | 000007.9940  <br>306 ILE 309 ALA | 00000001381402.7500  <br>310 LEU 379 ALA 484 HEM A 600       | VAL 115 PHE 116 LEU 214 PHE 215 ILE 218 ILE 243 ARG 249 THR |
| 012  <br>218 ARG     | 000007.7560  <br>249 GLY 302 THR | 00000002064318.1250  <br>305 MET 306 ILE 309 ALA 310 LEU 379 | LEU 107 THR 108 PHE 113 VAL 115 PHE 116 LEU 214 PHE 215 ILE |
| 013  <br>306 ILE     | 000007.6370  <br>309 ALA 310 LEU | 00000002523508.5000  <br>379 ALA 484 HEM A 600               | LEU 107 PHE 113 VAL 115 PHE 116 PHE 215 ILE 218 THR 305 MET |
| 014  <br>LEU 379 PRO | 000007.6230  <br>380 LEU 401 ALA | 00000002583847.7500  <br>481 GLY 482 THR 483 ALA 484         | GLY 49 PRO 50 LEU 51 TYR 52 VAL 219 PRO 376 LEU 377 SER 378 |
| 015  <br>306 ILE     | 000007.5370  <br>309 ALA 310 LEU | 00000002987485.0000  <br>379 ALA 484 HEM A 600               | VAL 115 LEU 214 PHE 215 ILE 218 ILE 243 ARG 249 THR 305 MET |
| 016  <br>309 ALA     | 000007.4010  <br>310 ALA 375 LEU | 00000003758331.2500  <br>379 ALA 484 SER 485 HEM A 600       | VAL 115 PHE 116 LEU 214 PHE 215 ILE 218 THR 305 MET 306 ILE |
| 017  <br>310 THR     | 000007.3400  <br>314 ALA 375 LEU | 00000004165898.2500  <br>379 ALA 484 HEM A 600               | PHE 113 VAL 115 PHE 116 ILE 218 THR 305 MET 306 ILE 309 ALA |

```

018 |          000007.2920 | 00000004517447.5000 | GLY  49 PRO  50 LEU  51 TYR  52 VAL  219 ALA  375 PRO  376 LEU  377
SER  378 LEU  379 ALA  481 GLY  482 THR  483 ALA  484
019 |          000007.2890 | 00000004540379.5000 | LEU  107 PHE  113 VAL  115 PHE  116 PHE  215 ILE  218 THR  305 MET
306 ILE  309 ALA  310 THR  314 ALA  484 SER  485
020 |          000007.2020 | 00000005258525.5000 | LEU  107 PHE  113 VAL  115 PHE  116 LEU  214 PHE  215 ILE  218 ILE
243 GLY  246 ARG  249 THR  305 MET  306 ILE  309 ALA  310 LEU  379 ALA  484
021 |          000007.1530 | 00000005711911.5000 | PHE  116 PHE  215 ILE  218 ILE  309 ALA  310 GLU  313 THR  314 ALA
375 SER  378 LEU  379 PRO  380 ALA  484 SER  485
022 |          000007.0800 | 00000006460873.0000 | PHE  116 PHE  215 ILE  218 ILE  309 ALA  310 THR  314 ALA  375 LEU
379 ALA  484 HEM A 600
023 |          000007.0090 | 00000007283412.0000 | PHE  116 ILE  218 ILE  309 ALA  310 THR  314 ALA  375 SER  378 LEU
379 ALA  484 SER  485
024 |          000006.9850 | 00000007584502.5000 | VAL  115 PHE  116 PHE  215 ILE  218 THR  305 MET  306 ILE  309 ALA
310 THR  314 ALA  375 ALA  484 SER  485
025 |          000006.8740 | 00000009147264.0000 | VAL  115 PHE  116 ILE  218 MET  306 ILE  309 ALA  310 THR  314 ALA
375 SER  378 LEU  379 PRO  380 ALA  484

```

After clustering the 25 runs, the following 7 distinct complex conformations were found:  
[They all differ by at least 5.0 A heavy atom RMSD]

```

Clu |Bind.energy[kcal/mol]|Dissoc. constant [pM]| Contacting receptor residues
-----+-----+-----+-----
001 |          000008.4470 | 00000000643082.8125 | VAL  115 PHE  116 PHE  215 THR  305 MET  306 ILE  309 ALA  310 THR
314 PRO  374 ALA  375 LEU  379 SER  485 HEM A 600
002 |          000008.2310 | 00000000925970.1875 | VAL  115 PHE  116 LEU  214 PHE  215 ILE  218 ARG  249 THR  305 MET
306 ILE  309 ALA  310 LEU  379 HEM A 600
003 |          000007.7560 | 00000002064318.1250 | LEU  107 THR  108 PHE  113 VAL  115 PHE  116 LEU  214 PHE  215 ILE
218 ARG  249 GLY  302 THR  305 MET  306 ILE  309 ALA  310 LEU  379
004 |          000007.6230 | 00000002583847.7500 | GLY  49 PRO  50 LEU  51 TYR  52 VAL  219 PRO  376 LEU  377 SER  378
LEU  379 PRO  380 LEU  401 ALA  481 GLY  482 THR  483 ALA  484
005 |          000007.2920 | 00000004517447.5000 | GLY  49 PRO  50 LEU  51 TYR  52 VAL  219 ALA  375 PRO  376 LEU  377
SER  378 LEU  379 ALA  481 GLY  482 THR  483 ALA  484
006 |          000007.1530 | 00000005711911.5000 | PHE  116 PHE  215 ILE  218 ILE  309 ALA  310 GLU  313 THR  314 ALA
375 SER  378 LEU  379 PRO  380 ALA  484 SER  485
007 |          000006.8740 | 00000009147264.0000 | VAL  115 PHE  116 ILE  218 MET  306 ILE  309 ALA  310 THR  314 ALA
375 SER  378 LEU  379 PRO  380 ALA  484

```

d) CYP81AA2(mut6) flexible receptor sidechains, all 100 docking results

Ensemble docking result analysis

=====

The ligand was docked 20 times ["Run"] with VINA against each of the 5 receptors ["Rec"] in the ensemble, yielding the following 100 results, sorted by binding energy:

[More positive energies indicate stronger binding, and negative energies mean no binding]

| Rec | Run | Bind.energy[kcal/mol] | Dissoc. constant [pM] | Contacting receptor residues                                                                                                    |
|-----|-----|-----------------------|-----------------------|---------------------------------------------------------------------------------------------------------------------------------|
| 001 | 001 | 000008.4390           | 00000000651824.9375   | VAL 115 PHE 116 PHE 215 THR 305 MET 306 ILE 309 ALA 310 THR 314 PRO 374 ALA 375 LEU 379 SER 485 HEM A 600                       |
| 001 | 002 | 000008.2390           | 00000000913551.2500   | VAL 115 PHE 116 LEU 214 PHE 215 ILE 218 ARG 249 THR 305 MET 306 ILE 309 ALA 310 LEU 379 HEM A 600                               |
| 001 | 003 | 000008.0320           | 00000001295585.1250   | LEU 107 VAL 115 LEU 214 PHE 215 ILE 218 ILE 243 ARG 249 THR 305 MET 306 ILE 309 ALA 310 THR 314 ALA 484                         |
| 001 | 004 | 000008.0020           | 00000001362875.6250   | LEU 107 VAL 115 LEU 214 PHE 215 ILE 218 ILE 243 ARG 249 THR 305 MET 306 ILE 309 ALA 310 LEU 379 HEM A 600                       |
| 001 | 005 | 000008.0020           | 00000001362875.6250   | LEU 107 VAL 115 PHE 116 LEU 214 PHE 215 ILE 218 ILE 243 ARG 249 THR 305 MET 306 ILE 309 ALA 310 LEU 379 ALA 484 HEM A 600       |
| 001 | 006 | 000007.9960           | 00000001376747.5000   | LEU 107 THR 108 PHE 113 VAL 115 PHE 116 LEU 214 PHE 215 ILE 218 ILE 243 ARG 249 THR 305 MET 306 ILE 309 ALA 310 THR 314         |
| 001 | 007 | 000007.9070           | 00000001599897.5000   | VAL 115 PHE 116 PHE 215 ILE 218 THR 305 MET 306 ILE 309 ALA 310 ALA 379 ALA 379 ALA 484 HEM A 600                               |
| 001 | 008 | 000007.8600           | 00000001731982.8750   | LEU 107 PHE 113 VAL 115 PHE 116 LEU 214 PHE 215 ILE 218 ILE 243 ARG 249 THR 305 MET 306 ILE 309 ALA 310                         |
| 004 | 001 | 000007.8340           | 00000001809680.2500   | ARG 98 PRO 99 LYS 100 THR 101 SER 103 GLY 104 PHE 116 ILE 218 VAL 219 LEU 379 PRO 380                                           |
| 001 | 009 | 000007.7610           | 00000002046970.3750   | PHE 113 VAL 115 PHE 116 PHE 215 ILE 218 THR 305 MET 306 ILE 309 ALA 310 THR 314 SER 485 HEM A 600                               |
| 002 | 001 | 000007.7520           | 00000002078302.0000   | THR 101 SER 103 GLY 104 LEU 107 PHE 113 PHE 116 LEU 214 PRO 217 ILE 218 VAL 219 PRO 223 ILE 243 ARG 249 THR 305 MET 306 ILE 309 |
| 003 | 001 | 000007.7520           | 00000002078302.0000   | THR 101 SER 103 GLY 104 LEU 107 PHE 113 PHE 116 LEU 214 PRO 217 ILE 218 VAL 219 PRO 223 ILE 243 ARG 249 THR 305 MET 306 ILE 309 |
| 005 | 001 | 000007.7280           | 00000002164217.5000   | VAL 115 PHE 215 ILE 218 MET 306 ALA 310 THR 314 ALA 375 LEU 379 CYS 445 PRO 446 ALA 484 SER 485 HEM A 600                       |
| 001 | 010 | 000007.7140           | 00000002215965.7500   | VAL 115 PHE 116 PHE 215 MET 306 ALA 310 THR 314 PRO 374 ALA 375 LEU 379 ALA 484 SER 485 HEM A 600                               |
| 001 | 011 | 000007.7010           | 00000002265125.0000   | LEU 107 THR 108 PHE 113 VAL 115 PHE 116 LEU 214 PHE 215 ILE 218 ARG 249 GLY 302 THR 305 MET 306 ILE 309 ALA 310 LEU 379         |
| 001 | 012 | 000007.6870           | 00000002319286.0000   | LEU 107 VAL 115 PHE 116 PHE 215 ILE 218 THR 305 MET 306 ILE 309 ALA 310 LEU 379 ALA 484 HEM A 600                               |
| 001 | 013 | 000007.6450           | 00000002489663.7500   | LEU 107 PHE 113 VAL 115 LEU 214 PHE 215 ILE 218 ILE 243 ARG 249 THR 305 MET 306 ILE 309 ALA 310 LEU 379 ALA 484                 |







|     |  |     |     |     |             |  |                     |     |     |     |     |     |     |     |     |     |     |     |     |     |     |     |
|-----|--|-----|-----|-----|-------------|--|---------------------|-----|-----|-----|-----|-----|-----|-----|-----|-----|-----|-----|-----|-----|-----|-----|
| 003 |  | 016 |     |     | 000006.6750 |  | 00000012798531.0000 |     | VAL | 115 | PHE | 116 | PHE | 215 | ILE | 218 | MET | 306 | THR | 314 | PRO | 374 |
| ALA |  | 375 | LEU | 379 | ALA         |  | 484                 | SER | 485 | LEU |     | 486 | HEM | A   | 600 |     |     |     |     |     |     |     |
| 002 |  | 017 |     |     | 000006.6610 |  | 00000013104554.0000 |     | LEU | 107 | PHE | 116 | LEU | 214 | PHE | 215 | ILE | 218 | ILE | 243 | ARG | 249 |
| MET |  | 306 | ILE | 309 | ALA         |  | 310                 | LEU | 379 | ALA |     | 484 |     |     |     |     |     |     |     |     |     |     |
| 003 |  | 017 |     |     | 000006.6610 |  | 00000013104554.0000 |     | LEU | 107 | PHE | 116 | LEU | 214 | PHE | 215 | ILE | 218 | ILE | 243 | ARG | 249 |
| MET |  | 306 | ILE | 309 | ALA         |  | 310                 | LEU | 379 | ALA |     | 484 |     |     |     |     |     |     |     |     |     |     |
| 004 |  | 016 |     |     | 000006.6540 |  | 00000013260299.0000 |     | VAL | 115 | PHE | 116 | PHE | 215 | ILE | 218 | MET | 306 | THR | 314 | PRO | 374 |
| ALA |  | 375 | LEU | 379 | ALA         |  | 484                 | SER | 485 | LEU |     | 486 | HEM | A   | 600 |     |     |     |     |     |     |     |
| 002 |  | 018 |     |     | 000006.6450 |  | 00000013463266.0000 |     | LYS | 173 | LYS | 212 | PHE | 215 | PHE | 216 | GLN | 480 | SER | 487 | ARG | 488 |
| LYS |  | 489 | LYS | 490 | PRO         |  | 491                 | LEU | 492 |     |     |     |     |     |     |     |     |     |     |     |     |     |
| 003 |  | 018 |     |     | 000006.6450 |  | 00000013463266.0000 |     | LYS | 173 | LYS | 212 | PHE | 215 | PHE | 216 | GLN | 480 | SER | 487 | ARG | 488 |
| LYS |  | 489 | LYS | 490 | PRO         |  | 491                 | LEU | 492 |     |     |     |     |     |     |     |     |     |     |     |     |     |
| 005 |  | 018 |     |     | 000006.6350 |  | 00000013692430.0000 |     | ARG | 98  | PRO | 99  | LEU | 107 | PHE | 113 | VAL | 115 | PHE | 116 | PRO | 217 |
| ILE |  | 218 | ILE | 243 | LEU         |  | 379                 | PRO | 380 |     |     |     |     |     |     |     |     |     |     |     |     |     |
| 004 |  | 017 |     |     | 000006.6250 |  | 00000013925494.0000 |     | LYS | 173 | LYS | 212 | PHE | 215 | PHE | 216 | GLN | 480 | THR | 483 | SER | 487 |
| ARG |  | 488 | LYS | 489 | LYS         |  | 490                 | PRO | 491 | LEU |     | 492 |     |     |     |     |     |     |     |     |     |     |
| 005 |  | 019 |     |     | 000006.6140 |  | 00000014186450.0000 |     | THR | 101 | SER | 103 | GLY | 104 | LEU | 107 | PHE | 113 | VAL | 115 | PHE | 116 |
| LEU |  | 214 | ILE | 243 | ARG         |  | 249                 | THR | 305 | MET |     | 306 | ILE | 309 |     |     |     |     |     |     |     |     |
| 004 |  | 018 |     |     | 000006.5990 |  | 00000014550197.0000 |     | THR | 101 | SER | 103 | LEU | 107 | PHE | 116 | PRO | 217 | ILE | 218 | PRO | 223 |
| ILE |  | 242 | ILE | 243 | LEU         |  | 379                 | PRO | 380 |     |     |     |     |     |     |     |     |     |     |     |     |     |
| 005 |  | 020 |     |     | 000006.5790 |  | 00000015049742.0000 |     | THR | 101 | SER | 103 | GLY | 104 | LEU | 107 | PHE | 113 | LEU | 214 | PRO | 217 |
| ILE |  | 218 | PRO | 223 | ILE         |  | 243                 | GLY | 246 | ARG |     | 249 | MET | 306 | ILE | 309 |     |     |     |     |     |     |
| 004 |  | 019 |     |     | 000006.5100 |  | 00000016908564.0000 |     | LEU | 107 | PHE | 116 | PHE | 215 | ILE | 218 | THR | 305 | MET | 306 | ILE | 309 |
| ALA |  | 310 | THR | 314 | LEU         |  | 379                 | ALA | 484 |     |     |     |     |     |     |     |     |     |     |     |     |     |
| 002 |  | 019 |     |     | 000006.4890 |  | 00000017518622.0000 |     | PHE | 116 | PHE | 215 | ILE | 218 | MET | 306 | ILE | 309 | ALA | 310 | THR | 314 |
| ALA |  | 375 | LEU | 379 | ALA         |  | 484                 | HEM | A   | 600 |     |     |     |     |     |     |     |     |     |     |     |     |
| 003 |  | 019 |     |     | 000006.4890 |  | 00000017518622.0000 |     | PHE | 116 | PHE | 215 | ILE | 218 | MET | 306 | ILE | 309 | ALA | 310 | THR | 314 |
| ALA |  | 375 | LEU | 379 | ALA         |  | 484                 | HEM | A   | 600 |     |     |     |     |     |     |     |     |     |     |     |     |
| 004 |  | 020 |     |     | 000006.4790 |  | 00000017816814.0000 |     | VAL | 115 | PHE | 116 | PHE | 215 | ILE | 218 | MET | 306 | ILE | 309 | ALA | 310 |
| GLU |  | 313 | THR | 314 | PRO         |  | 374                 | ALA | 375 | SER |     | 378 | LEU | 379 | SER |     | 485 | HEM | A   | 600 |     |     |
| 002 |  | 020 |     |     | 000006.4690 |  | 00000018120080.0000 |     | PHE | 116 | PHE | 215 | ILE | 218 | THR | 305 | MET | 306 | ILE | 309 | ALA | 310 |
| THR |  | 314 | PRO | 374 | ALA         |  | 375                 | LEU | 379 | ALA |     | 484 | SER | 485 |     |     |     |     |     |     |     |     |
| 003 |  | 020 |     |     | 000006.4690 |  | 00000018120080.0000 |     | PHE | 116 | PHE | 215 | ILE | 218 | THR | 305 | MET | 306 | ILE | 309 | ALA | 310 |
| THR |  | 314 | PRO | 374 | ALA         |  | 375                 | LEU | 379 | ALA |     | 484 | SER | 485 |     |     |     |     |     |     |     |     |

After clustering the 100 runs, the following 12 distinct complex conformations were found:

[They all differ by at least 5.0 A heavy ligand atom RMSD, and have been saved as YOb files with terminal number "Num"]

| Num |  | Rec |  | Run |  | Bind.energy[kcal/mol] |  | Dissoc. constant [pM] |  | Contacting receptor residues                        |
|-----|--|-----|--|-----|--|-----------------------|--|-----------------------|--|-----------------------------------------------------|
| 001 |  | 001 |  | 001 |  | 000008.4390           |  | 00000000651824.9375   |  | VAL 115 PHE 116 PHE 215 THR 305 MET 306 ILE 309 ALA |
| 310 |  | THR |  | 314 |  | PRO                   |  | 374                   |  | ALA 375 LEU 379 SER 485 HEM A 600                   |
| 002 |  | 001 |  | 002 |  | 000008.2390           |  | 00000000913551.2500   |  | VAL 115 PHE 116 LEU 214 PHE 215 ILE 218 ARG 249 THR |
| 305 |  | MET |  | 306 |  | ILE                   |  | 309                   |  | ALA 310 LEU 379 HEM A 600                           |

|                 |                 |                     |         |         |         |         |         |         |         |
|-----------------|-----------------|---------------------|---------|---------|---------|---------|---------|---------|---------|
| 003   001   003 | 000007.8600     | 00000001731982.8750 | LEU     | 107 PHE | 113 VAL | 115 PHE | 116 LEU | 214 PHE | 215 ILE |
| 218 ILE 243 ARG | 249 THR 305 MET | 306 ILE 309 ALA     | 310     |         |         |         |         |         |         |
| 004   004   001 | 000007.8340     | 00000001809680.2500 | ARG     | 98 PRO  | 99 LYS  | 100 THR | 101 SER | 103 GLY | 104 PHE |
| 116 ILE 218 VAL | 219 LEU 379 PRO | 380                 |         |         |         |         |         |         |         |
| 005   002   001 | 000007.7520     | 00000002078302.0000 | THR     | 101 SER | 103 GLY | 104 LEU | 107 PHE | 113 PHE | 116 LEU |
| 214 PRO 217 ILE | 218 VAL 219 PRO | 223 ILE 243 ARG     | 249 THR | 305 MET | 306 ILE | 309     |         |         |         |
| 006   001   004 | 000007.7140     | 00000002215965.7500 | VAL     | 115 PHE | 116 PHE | 215 MET | 306 ALA | 310 THR | 314 PRO |
| 374 ALA 375 LEU | 379 ALA 484 SER | 485 HEM A 600       |         |         |         |         |         |         |         |
| 007   001   005 | 000007.6280     | 00000002562134.2500 | GLY     | 49 PRO  | 50 LEU  | 51 TYR  | 52 VAL  | 219 PRO | 376 LEU |
| 377 SER 378 LEU | 379 PRO 380 LEU | 401 ALA 481 GLY     | 482 THR | 483 ALA | 484     |         |         |         |         |
| 008   005   002 | 000007.5590     | 00000002878588.2500 | THR     | 101 SER | 103 GLY | 104 LEU | 107 PHE | 113 VAL | 115 PHE |
| 116 LEU 214 PRO | 217 ILE 218 PRO | 223 ILE 242 ILE     | 243 MET | 306 ILE | 309     |         |         |         |         |
| 009   004   003 | 000007.4920     | 00000003223229.2500 | ARG     | 98 PRO  | 99 LYS  | 100 THR | 101 GLY | 104 THR | 108 PHE |
| 116 ILE 218 VAL | 219 PRO 380     |                     |         |         |         |         |         |         |         |
| 010   002   003 | 000007.4880     | 00000003245063.7500 | LYS     | 173 LYS | 212 PHE | 215 PHE | 216 VAL | 219 GLN | 480 GLY |
| 482 THR 483 SER | 487             |                     |         |         |         |         |         |         |         |
| 011   004   005 | 000007.3240     | 00000004279931.5000 | GLY     | 49 PRO  | 50 LEU  | 51 TYR  | 52 VAL  | 219 ALA | 375 PRO |
| 376 LEU 377 SER | 378 LEU 379 ALA | 481 GLY 482 THR     | 483 ALA | 484     |         |         |         |         |         |
| 012   005   007 | 000007.2040     | 00000005240805.0000 | LYS     | 173 LYS | 212 PHE | 215 PHE | 216 ILE | 218 VAL | 219 GLN |
| 480 GLY 482 THR | 483 ALA 484 SER | 487 PRO 491         |         |         |         |         |         |         |         |
